# Supplementary material for: A series of isostructural polyoxometalate-based metal–organic frameworks of 3,5-bis(1′,2′,4′-triazol-1′-yl)pyridine: synthesis, structures and electrocatalytic properties
Source: Royal Society of Chemistry journal article supplement (doi:10.1039/d4dt02945c), 2024-12-11
Supplement: d4dt02945c1.pdf [file d4dt02945c1.pdf]

## Electronic Supplementary Information

### A Series of Isostructural Polyoxometalate-Based Metal–Organic Frameworks of 3,5-Bis(1',2',4'-triazol-1'-yl)pyridine: Synthesis, Structures and Electrocatalytic Properties

Tinghui Xie<sup>a</sup>, Xinfang Wang<sup>a</sup>, Tingting Cao<sup>a</sup>, Zuogang Huang<sup>a,b,\*</sup>, Huaguang Yu<sup>a,b,\*</sup>

<sup>a</sup>*Key Laboratory of Optoelectronic Chemical Materials and Devices, Ministry of Education, College of Optoelectronic Materials and Technology, Jiangnan University, Wuhan 430056, P. R. China*

<sup>b</sup>*State Key Laboratory of Precision Blasting, Jiangnan University, Wuhan 430056, P. R. China*

---

\*Corresponding author. Tel.: +86-27-84225508; fax: +86-27-84225508.

*Email addresses:* hzg19@jhun.edu.cn (Zuogang Huang), hgyu@jhun.edu.cn (Huaguang Yu)

## Contents

|          |                                                                    |            |
|----------|--------------------------------------------------------------------|------------|
| <b>1</b> | <b>Material and Methods</b>                                        | <b>S7</b>  |
| <b>2</b> | <b>Synthesis</b>                                                   | <b>S7</b>  |
| 2.1      | Synthesis of POMOFs . . . . .                                      | S7         |
| 2.2      | Synthesis of Co/Ni-POMOF-T . . . . .                               | S8         |
| <b>3</b> | <b>Structure Determination of Single Crystals</b>                  | <b>S8</b>  |
| 3.1      | Crystal Structure of Compound <b>1</b> . . . . .                   | S10        |
| 3.2      | Crystal Structure of Compound <b>2</b> . . . . .                   | S14        |
| 3.3      | Crystal Structure of Compound <b>3</b> . . . . .                   | S19        |
| <b>4</b> | <b>PXRD, FT-IR, Raman and TGA</b>                                  | <b>S23</b> |
| <b>5</b> | <b>SEM, TEM and XPS</b>                                            | <b>S31</b> |
| <b>6</b> | <b>Electrochemical Properties of Co/Ni-POMOF and Co/Ni-POMOF-T</b> | <b>S39</b> |
| 6.1      | Preparation of Working Electrodes . . . . .                        | S39        |
| 6.2      | Electrochemical Measurements . . . . .                             | S39        |

## List of Tables

|     |                                                                                                           |     |
|-----|-----------------------------------------------------------------------------------------------------------|-----|
| S1  | Crystallographic data and structure refinement parameters for compounds <b>1</b><br>– <b>3</b> . . . . .  | S9  |
| S2  | Selected bond lengths (Å) of compound <b>1</b> . . . . .                                                  | S11 |
| S3  | Selected angles (°) of compound <b>1</b> . . . . .                                                        | S12 |
| S4  | Selected bond lengths (Å) of compound <b>2</b> . . . . .                                                  | S14 |
| S5  | Selected angles (°) of compound <b>2</b> . . . . .                                                        | S17 |
| S6  | Selected bond lengths (Å) of compound <b>3</b> . . . . .                                                  | S19 |
| S7  | Selected angles (°) of compound <b>3</b> . . . . .                                                        | S22 |
| S8  | The main functional groups determined by Raman spectroscopy and the de-convoluted Raman spectra . . . . . | S27 |
| S9  | XPS binding energies for the materials . . . . .                                                          | S32 |
| S10 | Atomic ratios of surface species determined by the XPS survey spectra and the relative ratios . . . . .   | S33 |
| S11 | $E_{1/2}$ and $\Delta E_p$ data of the Co-POMOFs materials . . . . .                                      | S45 |
| S12 | $E_{1/2}$ and $\Delta E_p$ data of the Ni-POMOFs materials . . . . .                                      | S47 |
| S13 | Comparison of overpotentials of the thermal derivation composites with other studies . . . . .            | S48 |

## List of Figures

|     |                                                                                                                                                                                                                                                                                                                                                                                                                                                                                                                                                                                              |     |
|-----|----------------------------------------------------------------------------------------------------------------------------------------------------------------------------------------------------------------------------------------------------------------------------------------------------------------------------------------------------------------------------------------------------------------------------------------------------------------------------------------------------------------------------------------------------------------------------------------------|-----|
| S1  | The morphology of the crystals of (a) <b>1</b> , (b) <b>2</b> and (c) <b>3</b> . . . . .                                                                                                                                                                                                                                                                                                                                                                                                                                                                                                     | S8  |
| S2  | Abstracting the underlying topology in compound <b>1</b> . (a) Co1 cation is regarded as a 4-connected node. (b) 3,5-bis(1',2',4'-triazol-1'-yl)pyridine ligand can be considered as a 3-connected node. (c) The $(\beta\text{-Mo}_8\text{O}_{26})^{4-}$ anion is considered as linkage. . . . .                                                                                                                                                                                                                                                                                             | S10 |
| S3  | (a) Coordination environment (at 50 % probability level) of the Ni(II) centers in compound <b>2</b> . The hydrogen atoms and crystal water molecules are omitted for clarity. Symmetry codes for the generated atoms: #1: 2 - X, - Y, 1 - Z; #2: 3/2 - X, 1 - Y, - 1/2 + Z; #3: + X, 1/2 - Y, - 1/2 + Z; #4: 3/2 - X, 1 - Y, 1/2 + Z; #5: + X, 1/2 - Y, 1/2 + Z. (b) Perspective view of the 3D framework in compound <b>2</b> along the <i>a</i> -axis. . . . .                                                                                                                             | S14 |
| S4  | Abstracting the underlying topology in compound <b>2</b> . (a) Ni1 cation is regarded as a 4-connected node. (b) 3,5-Bis(1',2',4'-triazol-1'-yl)pyridine ligand can be considered as a 3-connected node. (c) The $(\beta\text{-Mo}_8\text{O}_{26})^{4-}$ anion is considered as linkage. (d) Schematic view of the 3D (3,4)-connected framework with the $(12)(6^3 \cdot 12^3)_2(6^3)_2$ topology in compound <b>2</b> . Color code: light green ball, 4-connected Ni(II) node; grey ball, 3-connected btap node; blue stick, $(\beta\text{-Mo}_8\text{O}_{26})^{4-}$ anion linkage. . . . . | S16 |
| S5  | (a) Coordination environment (at 50 % probability level) of the Zn(II) centers in compound <b>3</b> . The hydrogen atoms and crystal water molecules are omitted for clarity. Symmetry codes for the generated atoms: #1: 2 - X, - Y, 1 - Z; #2: 3/2 - X, 1 - Y, - 1/2 + Z; #3: + X, 1/2 - Y, - 1/2 + Z; #4: 3/2 - X, 1 - Y, 1/2 + Z; #5: + X, 1/2 - Y, 1/2 + Z. (b) Perspective view of the 3D framework in compound <b>3</b> along the <i>a</i> -axis. . . . .                                                                                                                             | S19 |
| S6  | Abstracting the underlying topology in compound <b>3</b> . (a) Zn1 cation is regarded as a 4-connected node. (b) 3,5-Bis(1',2',4'-triazol-1'-yl)pyridine ligand can be considered as a 3-connected node. (c) The $(\beta\text{-Mo}_8\text{O}_{26})^{4-}$ anion is considered as linkage. (d) Schematic view of the 3D (3,4)-connected framework with the $(12)(6^3 \cdot 12^3)_2(6^3)_2$ topology in compound <b>3</b> . Color code: green ball, 4-connected Zn(II) node; grey ball, 3-connected btap node; blue stick, $(\beta\text{-Mo}_8\text{O}_{26})^{4-}$ anion linkage. . . . .       | S21 |
| S7  | The experimental PXRD patterns versus the simulated patterns of compounds (a) <b>1</b> , (b) <b>2</b> and (c) <b>3</b> . . . . .                                                                                                                                                                                                                                                                                                                                                                                                                                                             | S25 |
| S8  | FT-IR spectra of (a) <b>1</b> , (b) <b>2</b> and (c) <b>3</b> . . . . .                                                                                                                                                                                                                                                                                                                                                                                                                                                                                                                      | S26 |
| S9  | Raman spectra of (a) <b>1</b> , (b) <b>2</b> and (c) <b>3</b> . . . . .                                                                                                                                                                                                                                                                                                                                                                                                                                                                                                                      | S26 |
| S10 | TG curves of (a) <b>1</b> , (b) <b>2</b> and (c) <b>3</b> . . . . .                                                                                                                                                                                                                                                                                                                                                                                                                                                                                                                          | S26 |
| S11 | PXRD patterns of Co-POMOF-800, Co-POMOF-900 and Co-POMOF-1000. . . . .                                                                                                                                                                                                                                                                                                                                                                                                                                                                                                                       | S27 |
| S12 | PXRD patterns of (a) Ni-POMOF-900, and (b) Ni-POMOF-700, Ni-POMOF-800 and Ni-POMOF-1000. . . . .                                                                                                                                                                                                                                                                                                                                                                                                                                                                                             | S27 |

|     |                                                                                                                                                                                                                                                                                                                                                                                                                                                                 |     |
|-----|-----------------------------------------------------------------------------------------------------------------------------------------------------------------------------------------------------------------------------------------------------------------------------------------------------------------------------------------------------------------------------------------------------------------------------------------------------------------|-----|
| S13 | FT-IR spectra of (a) Co-POMOF-700, Co-POMOF-800, Co-POMOF-900 and Co-POMOF-1000, and (b) Ni-POMOF-700, Ni-POMOF-800, Ni-POMOF-900 and Ni-POMOF-1000. . . . .                                                                                                                                                                                                                                                                                                    | S28 |
| S14 | Raman spectra of (a) Co-POMOF-700, (b) Co-POMOF-800, (c) Co-POMOF-900 and (d) Co-POMOF-1000. . . . .                                                                                                                                                                                                                                                                                                                                                            | S29 |
| S15 | Raman spectra of (a) Ni-POMOF-700, (b) Ni-POMOF-800, (c) Ni-POMOF-900 and (d) Ni-POMOF-1000. . . . .                                                                                                                                                                                                                                                                                                                                                            | S30 |
| S16 | SEM images of (a)(b) Co-POMOF and (c)(d) Ni-POMOF. . . . .                                                                                                                                                                                                                                                                                                                                                                                                      | S33 |
| S17 | SEM images of (a)(b) Co-POMOF-700 and (c)(d) Ni-POMOF-900. . . . .                                                                                                                                                                                                                                                                                                                                                                                              | S34 |
| S18 | (a) TEM and (b,c) HR-TEM images of Ni-POMOF-900. (d – i) EDX mapping images of Ni-POMOF-900. . . . .                                                                                                                                                                                                                                                                                                                                                            | S35 |
| S19 | (a) XPS spectra of Co-POMOF before and after OER, and Co-POMOF-700 before and after OER. (b) XPS spectra of Ni-POMOF before and after OER, and Ni-POMOF-900 before and after OER. . . . .                                                                                                                                                                                                                                                                       | S35 |
| S20 | (a) Co 2p XPS spectra of Co-POMOF before and after OER. (b) Mo 3d XPS spectra of Co-POMOF before and after OER. (c) O 1s XPS spectra of Co-POMOF before and after OER. (d) N 1s XPS spectra of Co-POMOF before and after OER. . . . .                                                                                                                                                                                                                           | S36 |
| S21 | Ni 2p XPS spectra of (a) Ni-POMOF, and (b) Ni-POMOF-900 before and after OER. Mo 3d XPS spectra of (c) Ni-POMOF, and (d) Ni-POMOF-900 before and after OER. O 1s XPS spectra of (e) Ni-POMOF, and (f) Ni-POMOF-900 before and after OER. N 1s XPS spectra of (g) Ni-POMOF, and (h) Ni-POMOF-900 before and after OER. . . . .                                                                                                                                   | S37 |
| S22 | OER pathway. . . . .                                                                                                                                                                                                                                                                                                                                                                                                                                            | S38 |
| S23 | (a) PXRD patterns of Co-POMOF-700/GE before and after OER. (b) PXRD patterns of Ni-POMOF-900/GE before and after OER. . . . .                                                                                                                                                                                                                                                                                                                                   | S38 |
| S24 | (a) LSV curves with the potential range of 1.0 to 1.8 V ( <i>vs.</i> RHE) in 1 M KOH for OER. (b) Tafel plots from the LSV curves. (c) EIS curves. (d) LSV curves of Ni-POMOF-900 before and after 2000 CV cycles (inset: chronoamperometric measurement at 10 mA cm <sup>-2</sup> for Ni-POMOF-900 in 24 h. . . . .                                                                                                                                            | S40 |
| S25 | Double-layer capacitance ( $C_{dl}$ ) from the CV curves (Insert: CV curves) for (a) Co-POMOF, (b) Co-POMOF-700, (c) Ni-POMOF and (d) Ni-POMOF-900. . . . .                                                                                                                                                                                                                                                                                                     | S41 |
| S26 | CV curves of (a) Co-POMOF, (c) Co-POMOF-700, (e) Co-POMOF-800, (g) Co-POMOF-900 and (i) Co-POMOF-1000 at different scan rates (10, 30, 50, 70, 90, 110, 130, 150, 170 and 190 mv s <sup>-1</sup> with 0.97 to 1.67 V ( <i>vs.</i> RHE). The linear relationship between the anode (red) and cathode (black) CV current densities with different scan rates of (b) Co-POMOF, (d) Co-POMOF-700, (f) Co-POMOF-800, (h) Co-POMOF-900 and (j) Co-POMOF-1000. . . . . | S43 |

|     |                                                                                                                                                                                                                                                                                                                                                                                                                                                                                           |     |
|-----|-------------------------------------------------------------------------------------------------------------------------------------------------------------------------------------------------------------------------------------------------------------------------------------------------------------------------------------------------------------------------------------------------------------------------------------------------------------------------------------------|-----|
| S27 | CV curves of (a) Ni-POMOF, (c) Ni-POMOF-700, (e) Ni-POMOF-800, (g) Ni-POMOF-900 and (i) Ni-POMOF-1000 at different scan rates (10, 30, 50, 70, 90, 110, 130, 150, 170 and 190 $\text{mv s}^{-1}$ with 0.97 to 1.87 V ( <i>vs.</i> RHE). The linear relationship between the anode (red) and cathode (black) CV current densities with different half of the square of the scan rates of (b) Ni-POMOF, (d) Ni-POMOF-700, (f) Ni-POMOF-800, (h) Ni-POMOF-900 and (j) Ni-POMOF-1000. . . . . | S44 |
|-----|-------------------------------------------------------------------------------------------------------------------------------------------------------------------------------------------------------------------------------------------------------------------------------------------------------------------------------------------------------------------------------------------------------------------------------------------------------------------------------------------|-----|

## 1. Material and Methods

Cobalt nitrate ( $\text{Co}(\text{NO}_3)_2 \cdot 6\text{H}_2\text{O}$ ), nickel nitrate ( $\text{Ni}(\text{NO}_3)_2 \cdot 6\text{H}_2\text{O}$ ), zinc nitrate ( $\text{Zn}(\text{NO}_3)_2 \cdot 6\text{H}_2\text{O}$ ), and ammonium molybdate tetrahydrate ( $(\text{NH}_4)_6\text{Mo}_7\text{O}_{24} \cdot 4\text{H}_2\text{O}$ ) were used as received from Sinopharm Chemical Reagent Corporation. The ligand 3,5-bis(1',2',4'-triazol-1'-yl)pyridine (btap) was prepared according to the literature method [1, 2]. Powder X-ray diffraction (PXRD) data were collected using a Panalytical X'pert diffractometer with Cu  $K\alpha$  radiation ( $\lambda = 1.54178 \text{ \AA}$ ). Fourier transform infrared (FT-IR) spectroscopy was performed using a Bruker Tensor 27 FTIR spectrometer. Thermogravimetric analysis (TGA) were carried out using a TA Instruments SDT Q600 thermal analyzer under a constant stream of dry nitrogen gas (flow rate  $20 \text{ ml min}^{-1}$ ) over the temperature range of  $40 - 800 \text{ }^\circ\text{C}$  and at a heating rate of  $20 \text{ K min}^{-1}$ . Elemental analyses (C, H, and N) were carried out on an Elementar vario EL cube elemental analyzer. A Renishaw *InVia* Raman spectrometer was used to record Raman spectra. Transmission electron microscopy (TEM) images were obtained on a FEI Tecnai F20 transmission electron microscope. A Hitachi SU-8010 scanning electron microscope was used to ensure the morphology of the catalyst (SEM images), equipped with an energy-dispersive X-ray spectroscopy (EDXS). A Shimadzu Kratos Analytical AXIS SUPRA<sup>+</sup> X-ray photoelectron spectrometer equipped with a micro-focus Al  $K\alpha$  X-ray source was employed to perform X-ray photoelectron spectroscopy (XPS) measurements.

## 2. Synthesis

### 2.1. Synthesis of POMOFs

Synthesis of  $[\text{Co}^{\text{II}}(\text{btap})_2(\beta\text{-Mo}_8\text{O}_{26})(\text{H}_2\text{O})_4] \cdot 4\text{H}_2\text{O}$  (compound **1** or Co-POMOF). A mixture of  $\text{Co}(\text{NO}_3)_2 \cdot 6\text{H}_2\text{O}$  (73.0 mg, 0.25 mmol),  $(\text{NH}_4)_6\text{Mo}_7\text{O}_{24} \cdot 4\text{H}_2\text{O}$  (62.0 mg, 0.05 mmol), and btap (11.0 mg, 0.05 mmol) in 5 ml  $\text{H}_2\text{O}$  with 3 – 4 drops of 1 mol  $\text{l}^{-1}$  HCl solution was sealed in a 25 ml Teflon<sup>®</sup> reactor, which was heated at  $120 \text{ }^\circ\text{C}$  for 3 days. After being cooled to room temperature, large block pink crystals of compound **1** were obtained in about 50 % yield (based on btap). Elemental analysis results for  $\text{C}_{18}\text{H}_{30}\text{Co}_2\text{Mo}_8\text{N}_{14}\text{O}_{34}$ : Calc. (%), C 11.55, H 1.62, N 10.47; Found (%), C 11.23, H 1.95, N 10.25. FT-IR (KBr pellet,  $\text{cm}^{-1}$ ): 3620 (w), 3561 (m), 3479 (w), 3279 (m), 3134 (w), 3055 (w), 2971 (w), 1649 (m), 1597 (m), 1526 (s), 1448 (m), 1368 (m), 1295 (m), 1217 (m), 1171 (w), 1136 (m), 1047 (w), 993 (w), 954 (s), 912 (s), 826 (m), 719 (s), 651 (m), 561 (w), 465 (w).

Synthesis of  $[\text{Ni}^{\text{II}}(\text{btap})_2(\beta\text{-Mo}_8\text{O}_{26})(\text{H}_2\text{O})_4] \cdot 4\text{H}_2\text{O}$  (compound **2** or Ni-POMOF). The compound **2** was prepared similarly to that of compound **1**, but  $\text{Ni}(\text{NO}_3)_2 \cdot 6\text{H}_2\text{O}$  (73.0 mg, 0.25 mmol) was used instead of  $\text{Co}(\text{NO}_3)_2 \cdot 6\text{H}_2\text{O}$ . Large block green crystals of compound **2** were obtained in a 42 % yield based on btap. Elemental analysis results for  $\text{C}_{18}\text{H}_{30}\text{Ni}_2\text{Mo}_8\text{N}_{14}\text{O}_{34}$ : Calc. (%), C 11.55, H 1.62, N 10.48; Found (%), C 11.18, H 1.88, N 10.22. FT-IR (KBr pellet,  $\text{cm}^{-1}$ ): 3623 (w), 3576 (w), 3490 (w), 3322 (m), 3135 (w), 3057 (w), 1645 (m), 1549 (m), 1525 (s), 1452 (s), 1368 (m), 1304 (m), 1168 (m), 1136 (m), 1077 (w), 1052 (w), 999 (m), 955 (s), 910 (s), 826 (m), 718 (m), 665 (m), 640 (m), 559 (w), 519 (w), 461 (w).

Synthesis of  $[\text{Zn}^{\text{II}}(\text{btap})_2(\beta\text{-Mo}_8\text{O}_{26})(\text{H}_2\text{O})_4]\cdot 4\text{H}_2\text{O}$  (compound **3** or Zn-POMOF). The compound **3** was prepared similarly to that of the compound **1**, but  $\text{Zn}(\text{NO}_3)_2\cdot 6\text{H}_2\text{O}$  (73.0 mg, 0.25 mmol) was used instead of  $\text{Co}(\text{NO}_3)_2\cdot 6\text{H}_2\text{O}$ . Large colorless block crystals of Zn-POMOF were obtained in a 20 % yield based on btap. Elemental analysis results for  $\text{C}_{18}\text{H}_{30}\text{Zn}_2\text{Mo}_8\text{N}_{14}\text{O}_{34}$ : Calc. (%), C 11.47, H 1.60, N 10.40; Found (%), C 11.12, H 1.91, N 10.28. FT-IR (KBr pellet,  $\text{cm}^{-1}$ ): 3621 (w), 3561 (w), 3485 (w), 3297 (m), 3135 (w), 3053 (w), 2968 (w), 1781 (w), 1712 (w), 1645 (m), 1597 (m), 1528 (s), 1450 (m), 1371 (m), 1297 (m), 1218 (m), 1173 (m), 1138 (m), 1046 (w), 994 (m), 954 (s), 911 (s), 829 (m), 719 (m), 650 (m), 561 (m), 518 (w), 464 (w).

The morphology of the crystals of (a) **1**, (b) **2** and (c) **3** was presented in Fig. S1.

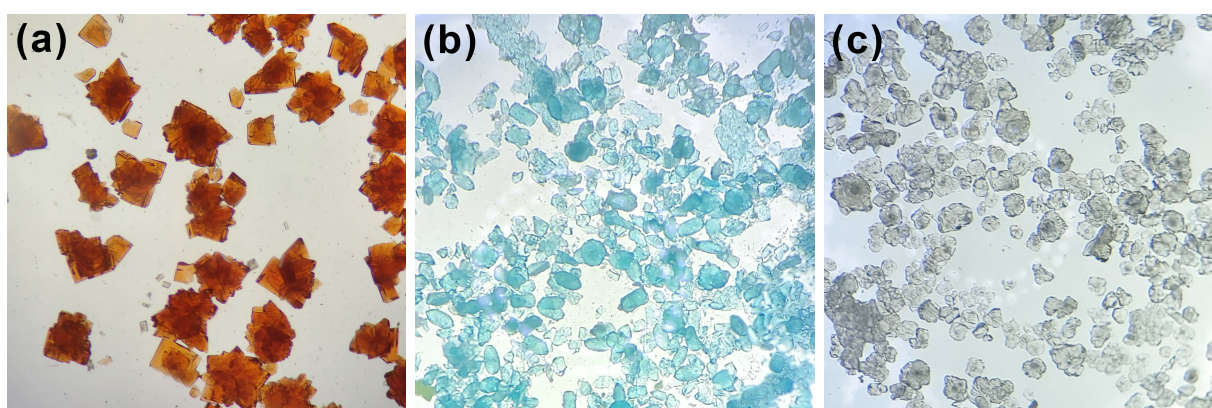

Figure S1: The morphology of the crystals of (a) **1**, (b) **2** and (c) **3**.

## 2.2. Synthesis of Co/Ni-POMOF-T

Co/Ni-POMOFs were calcined in a traditional tubular furnace at a rate of  $5\text{ }^\circ\text{C min}^{-1}$  and maintained for 2 h in argon atmosphere at different temperature to obtain Co and Ni-POMOF-T series ( $T = 700, 800, 900$  and  $1000\text{ }^\circ\text{C}$ ). Co-POMOF pyrolyzed at 700, 800, 900 and  $1000\text{ }^\circ\text{C}$ , were named Co-POMOF-700, Co-POMOF-800, Co-POMOF-900 and Co-POMOF-1000, respectively. Ni-POMOF heated at 700, 800, 900 and  $1000\text{ }^\circ\text{C}$  were denoted as Ni-POMOF-700, Ni-POMOF-800, Ni-POMOF-900 and Ni-POMOF-1000, respectively.

## 3. Structure Determination of Single Crystals

Suitable single crystals of the compounds **1**, **2** and **3** were selected for single crystal X-ray diffraction analyses. Crystallographic data were collected on a Bruker AXS SMART APEX II CCD single crystal X-ray diffractometer with graphite monochromated Mo  $K\alpha$  radiation ( $\lambda = 0.71073\text{ \AA}$ ). The APEX 2 program was used to collect the frames of data, index the reflections and determine the lattice parameters; SAINT [3] was used for the integration of the intensities of the reflections and scaling; SADABS [4] was used for the absorption correction; and SHELXTL [5, 6] was used for the space-group determination. Structures were solved by direct method or Patterson method with SHELXT program [7]



and refined by the full matrix least-square method on the basis of  $F^2$  using SHELXL-2014 program [8, 9] contained in OLEX2 suite graphical user interface [10]. All non-hydrogen atoms were refined with anisotropic displacement parameters during the final cycles. All hydrogen atoms of the organic molecule were placed by geometrical considerations and added to the structure factor calculation. The crystallographic information files (CIFs) were compiled with OLEX2. These data can be obtained free of charge from The Cambridge Crystallographic Data Centre (CCDC). CCDC 2373986 (for **1**), 2373987 (for **2**), and 2373988 (for **3**) contained the supplementary crystallographic data for this paper. The PLATON program enabled for the checking for additional symmetry elements. The overall structures of the compounds were analyzed using TOPOS software [11]. The formula for **1**, **2** and **3** were determined by single crystal structure. Crystallographic figures were generated with Diamond 3.1e software [12]. The detailed bond lengths and bond angles for these compounds were tabulated in Tables S2 – S7.

Table S1: Crystallographic data and structure refinement parameters for compounds **1** – **3**

|                                                   | <b>1</b>                                                                                        | <b>2</b>                                                                                        | <b>3</b>                                                                                        |
|---------------------------------------------------|-------------------------------------------------------------------------------------------------|-------------------------------------------------------------------------------------------------|-------------------------------------------------------------------------------------------------|
| Empirical formula                                 | C <sub>18</sub> H <sub>30</sub> Co <sub>2</sub> Mo <sub>8</sub> N <sub>14</sub> O <sub>34</sub> | C <sub>18</sub> H <sub>30</sub> Ni <sub>2</sub> Mo <sub>8</sub> N <sub>14</sub> O <sub>34</sub> | C <sub>18</sub> H <sub>30</sub> Zn <sub>2</sub> Mo <sub>8</sub> N <sub>14</sub> O <sub>34</sub> |
| Formula weight                                    | 1871.94                                                                                         | 1871.50                                                                                         | 1884.82                                                                                         |
| Temperature (K)                                   | 296(2)                                                                                          | 296(2)                                                                                          | 296(2)                                                                                          |
| Crystal system                                    | orthorhombic                                                                                    | orthorhombic                                                                                    | orthorhombic                                                                                    |
| Space group                                       | <i>Pbca</i> (no. 61)                                                                            | <i>Pbca</i> (no. 61)                                                                            | <i>Pbca</i> (no. 61)                                                                            |
| <i>a</i> (Å)                                      | 15.5814(7)                                                                                      | 15.7082(12)                                                                                     | 15.5823(6)                                                                                      |
| <i>b</i> (Å)                                      | 16.4046(8)                                                                                      | 16.2936(12)                                                                                     | 16.4405(7)                                                                                      |
| <i>c</i> (Å)                                      | 17.8430(8)                                                                                      | 17.7195(13)                                                                                     | 17.8841(7)                                                                                      |
| $\alpha$ (°)                                      | 90.00                                                                                           | 90.00                                                                                           | 90.00                                                                                           |
| $\beta$ (°)                                       | 90.00                                                                                           | 90.00                                                                                           | 90.00                                                                                           |
| $\gamma$ (°)                                      | 90.00                                                                                           | 90.00                                                                                           | 90.00                                                                                           |
| Volume (Å <sup>3</sup> )                          | 4560.8(4)                                                                                       | 4535.2(6)                                                                                       | 4581.6(3)                                                                                       |
| <i>Z</i>                                          | 4                                                                                               | 4                                                                                               | 4                                                                                               |
| Density (calc.) (g cm <sup>-3</sup> )             | 2.726                                                                                           | 2.741                                                                                           | 2.733                                                                                           |
| $\lambda$ (Mo K $\alpha$ ) (Å)                    | 0.71073                                                                                         | 0.71073                                                                                         | 0.71073                                                                                         |
| Absorption coefficient ( $\mu$ mm <sup>-1</sup> ) | 2.949                                                                                           | 3.064                                                                                           | 3.259                                                                                           |
| <i>F</i> (000)                                    | 3592.0                                                                                          | 3600.0                                                                                          | 3616.0                                                                                          |
| $2\theta_{\max}$ (°)                              | 57                                                                                              | 55                                                                                              | 55                                                                                              |
| Goodness-of-fit on $F^2$                          | 1.191                                                                                           | 1.238                                                                                           | 1.046                                                                                           |
| $R_{\text{int}}$                                  | 0.0510                                                                                          | 0.0454                                                                                          | 0.0533                                                                                          |
| $R_1/wR_2$ ( $I > 2\sigma(I)$ ) <sup>a</sup>      | 0.0183, 0.0458                                                                                  | 0.0170, 0.0419                                                                                  | 0.0225, 0.0453                                                                                  |
| $R_1/wR_2$ (all data)                             | 0.0193, 0.0462                                                                                  | 0.0179, 0.0422                                                                                  | 0.0319, 0.0480                                                                                  |

$$^a R_1 = \frac{\sum ||F_o| - |F_c||}{\sum |F_o|}; wR_2 = \left[ \frac{\sum w(F_o^2 - F_c^2)^2}{\sum w(F_o^2)^2} \right]^{1/2}.$$

### 3.1. Crystal Structure of Compound 1

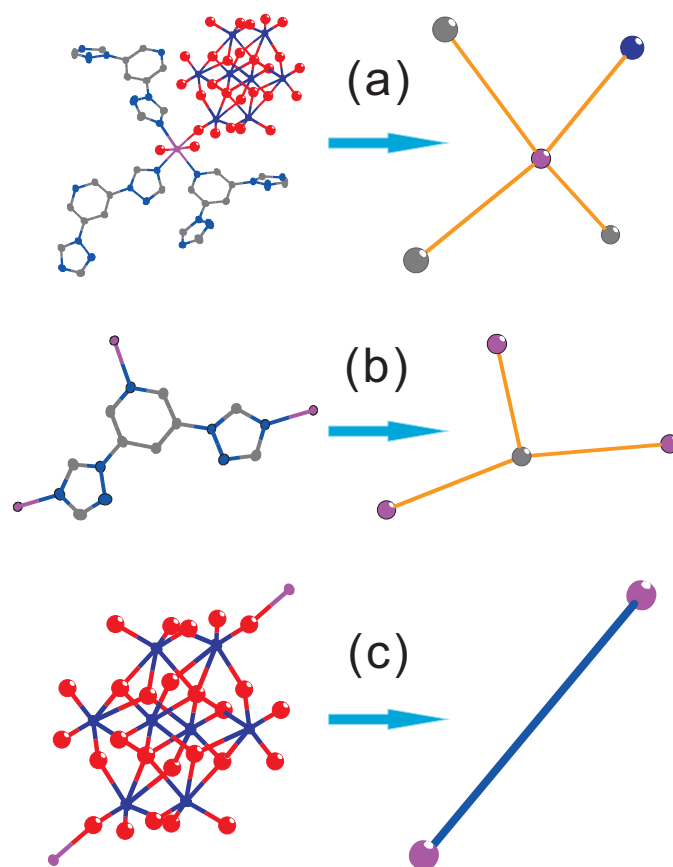

Figure S2: Abstracting the underlying topology in compound 1. (a) Co1 cation is regarded as a 4-connected node. (b) 3,5-bis(1',2',4'-triazol-1'-yl)pyridine ligand can be considered as a 3-connected node. (c) The  $(\beta\text{-Mo}_8\text{O}_{26})^{4-}$  anion is considered as linkage.

Table S2: Selected bond lengths (Å) of compound 1

| <b>bond</b> | <b>length (Å)</b> | <b>bond</b> | <b>length (Å)</b> |
|-------------|-------------------|-------------|-------------------|
| Mo3-O8      | 1.9599(17)        | Co1-N7#2    | 2.140(2)          |
| Mo3-O11     | 1.9325(17)        | Co1-N4#3    | 2.230(2)          |
| Mo3-O15#1   | 2.4065(16)        | Co1-O1      | 2.0534(19)        |
| Mo3-O15     | 2.0969(16)        | O8-Mo4#1    | 2.2989(17)        |
| Mo3-O9      | 1.6857(18)        | O11-Mo2#1   | 2.3407(17)        |
| Mo3-O10     | 1.7613(18)        | O15-Mo3#1   | 2.4065(16)        |
| Mo2-O8      | 2.0028(16)        | O10-Mo1#1   | 2.2475(18)        |
| Mo2-O11#1   | 2.3406(17)        | N1-C2       | 1.324(3)          |
| Mo2-O15     | 2.3495(16)        | N1-C1       | 1.360(4)          |
| Mo2-O5      | 1.8995(18)        | N7-Co1#4    | 2.140(2)          |
| Mo2-O6      | 1.6973(19)        | N7-C8       | 1.359(3)          |
| Mo2-O7      | 1.688(2)          | N7-C9       | 1.320(3)          |
| Mo1-O15     | 2.4691(16)        | N3-N2       | 1.372(3)          |
| Mo1-O14     | 1.9224(18)        | N3-C2       | 1.332(3)          |
| Mo1-O5      | 1.9045(18)        | N3-C3       | 1.420(3)          |
| Mo1-O3      | 1.7264(18)        | N4-Co1#5    | 2.230(2)          |
| Mo1-O10#1   | 2.2475(18)        | N4-C6       | 1.341(3)          |
| Mo1-O4      | 1.685(2)          | N4-C7       | 1.338(3)          |
| Mo4-O8#1    | 2.2989(17)        | C6-C5       | 1.381(3)          |
| Mo4-O11     | 1.9923(17)        | N2-C1       | 1.312(4)          |
| Mo4-O15     | 2.3234(16)        | C8-N6       | 1.312(3)          |
| Mo4-O14     | 1.8895(18)        | C7-C3       | 1.383(3)          |
| Mo4-O12     | 1.708(2)          | N5-C9       | 1.335(3)          |
| Mo4-O13     | 1.6956(19)        | N5-C5       | 1.419(3)          |
| Co1-O3      | 2.1624(18)        | N5-N6       | 1.364(3)          |
| Co1-N1      | 2.129(2)          | C5-C4       | 1.384(3)          |
| Co1-O2      | 2.0353(19)        | C4-C3       | 1.382(3)          |

<sup>1</sup> #1: 1 - X, 1 - Y, 1 - Z; #2: 3/2 - X, 2 - Y, - 1/2 + Z;  
#3: + X, 3/2 - Y, - 1/2 + Z; #4: 3/2 - X, 2 - Y, 1/2 + Z;  
#5: + X, 3/2 - Y, 1/2 + Z.

Table S3: Selected angles (°) of compound **1**

| angle                      | (°)        | angle                      | (°)        |
|----------------------------|------------|----------------------------|------------|
| O8–Mo3–O15                 | 79.37(7)   | N1–Co1–N4#2 <sup>1</sup>   | 174.88(8)  |
| O8–Mo3–O15#1 <sup>1</sup>  | 76.85(6)   | O2–Co1–O3                  | 89.58(8)   |
| O11–Mo3–O8                 | 150.37(7)  | O2–Co1–N1                  | 89.93(9)   |
| O11–Mo3–O15#1 <sup>1</sup> | 78.18(6)   | O2–Co1–N7#3 <sup>1</sup>   | 91.56(8)   |
| O11–Mo3–O15                | 79.47(7)   | O2–Co1–N4#2 <sup>1</sup>   | 89.10(8)   |
| O15–Mo3–O15#1 <sup>1</sup> | 76.39(6)   | O2–Co1–O1                  | 176.57(8)  |
| O9–Mo3–O8                  | 101.28(9)  | N7#3–Co1–O3 <sup>1</sup>   | 174.28(7)  |
| O9–Mo3–O11                 | 102.86(9)  | N7#3–Co1–N4#2 <sup>1</sup> | 91.77(8)   |
| O9–Mo3–O15                 | 100.75(8)  | O1–Co1–O3                  | 87.16(8)   |
| O9–Mo3–O15#1 <sup>1</sup>  | 176.79(8)  | O1–Co1–N1                  | 89.14(8)   |
| O9–Mo3–O10                 | 104.37(9)  | O1–Co1–N7#3 <sup>1</sup>   | 91.79(8)   |
| O10–Mo3–O8                 | 93.65(8)   | O1–Co1–N4#2 <sup>1</sup>   | 91.53(8)   |
| O10–Mo3–O11                | 96.74(8)   | Mo3–O8–Mo2                 | 108.71(8)  |
| O10–Mo3–O15                | 154.81(7)  | Mo3–O8–Mo4#1 <sup>1</sup>  | 111.56(7)  |
| O10–Mo3–O15#1 <sup>1</sup> | 8.45(7)    | Mo2–O8–Mo4#1 <sup>1</sup>  | 103.72(7)  |
| O8–Mo2–O11#1 <sup>1</sup>  | 71.44(6)   | Mo3–O11–Mo2#1 <sup>1</sup> | 111.16(7)  |
| O8–Mo2–O15                 | 72.63(6)   | Mo3–O11–Mo4                | 109.10(8)  |
| O11#1–Mo2–O15 <sup>1</sup> | 72.11(6)   | Mo4–O11–Mo2#1 <sup>1</sup> | 102.58(7)  |
| O5–Mo2–O8                  | 145.81(7)  | Mo3–O15–Mo3#1 <sup>1</sup> | 103.60(6)  |
| O5–Mo2–O11#1 <sup>1</sup>  | 84.26(7)   | Mo3–O15–Mo2                | 92.64(6)   |
| O5–Mo2–O15                 | 77.28(7)   | Mo3#1–O15–Mo1 <sup>1</sup> | 91.55(5)   |
| O6–Mo2–O8                  | 101.29(8)  | Mo3–O15–Mo1                | 164.85(8)  |
| O6–Mo2–O11#1 <sup>1</sup>  | 87.56(8)   | Mo3–O15–Mo4                | 92.52(6)   |
| O6–Mo2–O15                 | 159.68(8)  | Mo2–O15–Mo3#1 <sup>1</sup> | 95.92(6)   |
| O6–Mo2–O5                  | 101.31(9)  | Mo2–O15–Mo1                | 85.40(5)   |
| O7–Mo2–O8                  | 96.03(9)   | Mo4–O15–Mo3#1 <sup>1</sup> | 96.41(6)   |
| O7–Mo2–O11#1 <sup>1</sup>  | 164.33(9)  | Mo4–O15–Mo2                | 165.12(8)  |
| O7–Mo2–O15                 | 95.50(8)   | Mo4–O15–Mo1                | 85.97(5)   |
| O7–Mo2–O5                  | 102.72(9)  | Mo4–O14–Mo1                | 118.11(9)  |
| O7–Mo2–O6                  | 104.51(10) | Mo2–O5–Mo1                 | 118.49(9)  |
| O14–Mo1–O15                | 73.66(6)   | Mo1–O3–Co1                 | 168.91(11) |
| O14–Mo1–O10#1 <sup>1</sup> | 76.64(7)   | Mo3–O10–Mo1#1 <sup>1</sup> | 120.81(9)  |
| O5–Mo1–O15                 | 74.20(6)   | C2–N1–Co1                  | 127.34(18) |
| O5–Mo1–O14                 | 144.68(7)  | C2–N1–C1                   | 103.1(2)   |
| O5–Mo1–O10#1 <sup>1</sup>  | 78.57(7)   | C1–N1–Co1                  | 129.45(17) |
| O3–Mo1–O15                 | 94.11(7)   | C8–N7–Co1#4 <sup>1</sup>   | 126.06(16) |
| O3–Mo1–O14                 | 97.76(9)   | C9–N7–Co1#4 <sup>1</sup>   | 129.59(17) |
| O3–Mo1–O5                  | 98.77(8)   | C9–N7–C8                   | 103.3(2)   |
| O3–Mo1–O10#1 <sup>1</sup>  | 163.19(8)  | N2–N3–C3                   | 120.1(2)   |

Continued on next page

Table S3 – continued from previous page

| angle                      | (°)        | angle                    | (°)        |
|----------------------------|------------|--------------------------|------------|
| O10#1–Mo1–O15 <sup>1</sup> | 69.14(6)   | C2–N3–N2                 | 109.7(2)   |
| O4–Mo1–O15                 | 159.77(9)  | C2–N3–C3                 | 130.1(2)   |
| O4–Mo1–O14                 | 101.65(9)  | C6–N4–Co1#5 <sup>1</sup> | 115.65(15) |
| O4–Mo1–O5                  | 103.39(10) | C7–N4–Co1#5 <sup>1</sup> | 125.33(16) |
| O4–Mo1–O3                  | 106.07(10) | C7–N4–C6                 | 118.3(2)   |
| O4–Mo1–O10#1 <sup>1</sup>  | 90.65(9)   | N4–C6–C5                 | 122.1(2)   |
| O8#1–Mo4–O15 <sup>1</sup>  | 72.59(6)   | C1–N2–N3                 | 102.3(2)   |
| O11–Mo4–O8#1 <sup>1</sup>  | 72.54(6)   | N6–C8–N7                 | 114.7(2)   |
| O11–Mo4–O15                | 72.94(6)   | N1–C2–N3                 | 110.1(2)   |
| O14–Mo4–O8#1 <sup>1</sup>  | 84.82(7)   | N4–C7–C3                 | 121.8(2)   |
| O14–Mo4–O11                | 147.19(7)  | N2–C1–N1                 | 114.7(2)   |
| O14–Mo4–O15                | 77.86(7)   | C9–N5–C5                 | 129.2(2)   |
| O12–Mo4–O8#1 <sup>1</sup>  | 166.07(9)  | C9–N5–N6                 | 110.14(19) |
| O12–Mo4–O11                | 96.43(9)   | N6–N5–C5                 | 120.32(19) |
| O12–Mo4–O15                | 96.34(8)   | N7–C9–N5                 | 109.7(2)   |
| O12–Mo4–O14                | 101.39(9)  | C6–C5–N5                 | 119.9(2)   |
| O13–Mo4–O8#1 <sup>1</sup>  | 86.34(8)   | C6–C5–C4                 | 120.4(2)   |
| O13–Mo4–O11                | 101.26(8)  | C4–C5–N5                 | 119.6(2)   |
| O13–Mo4–O15                | 158.93(8)  | C8–N6–N5                 | 102.2(2)   |
| O13–Mo4–O14                | 100.63(9)  | C3–C4–C5                 | 116.6(2)   |
| O13–Mo4–O12                | 104.51(10) | C7–C3–N3                 | 120.7(2)   |
| O3–Co1–N4#2 <sup>1</sup>   | 82.64(7)   | C4–C3–N3                 | 118.5(2)   |
| N1–Co1–O3                  | 92.32(7)   | C4–C3–C7                 | 120.8(2)   |
| N1–Co1–N7#3 <sup>1</sup>   | 93.29(8)   |                          |            |

<sup>1</sup> #1: 1 – X, 1 – Y, 1 – Z; #2: 3/2 – X, 2 – Y, – 1/2 + Z;  
#3: + X, 3/2 – Y, – 1/2 + Z; #4: 3/2 – X, 2 – Y, 1/2 + Z;  
#5: + X, 3/2 – Y, 1/2 + Z.

### 3.2. Crystal Structure of Compound 2

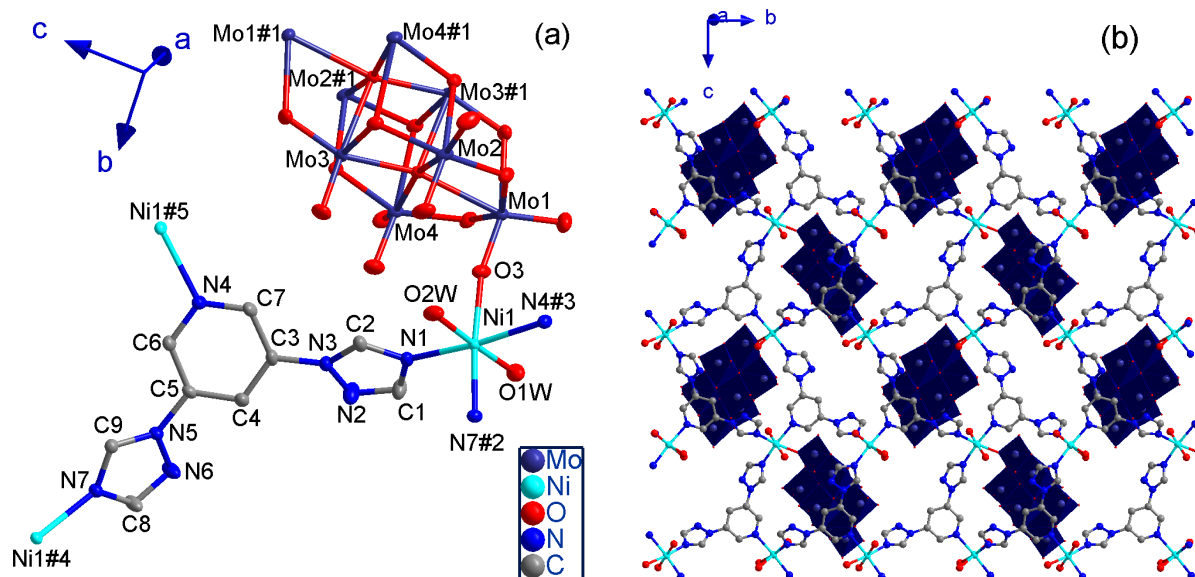

Figure S3: (a) Coordination environment (at 50 % probability level) of the Ni(II) centers in compound **2**. The hydrogen atoms and crystal water molecules are omitted for clarity. Symmetry codes for the generated atoms: #1:  $2 - X, - Y, 1 - Z$ ; #2:  $3/2 - X, 1 - Y, - 1/2 + Z$ ; #3:  $+ X, 1/2 - Y, - 1/2 + Z$ ; #4:  $3/2 - X, 1 - Y, 1/2 + Z$ ; #5:  $+ X, 1/2 - Y, 1/2 + Z$ . (b) Perspective view of the 3D framework in compound **2** along the *a*-axis.

Table S4: Selected bond lengths (Å) of compound **2**

| bond      | length (Å) | bond      | length (Å) |
|-----------|------------|-----------|------------|
| Mo3–O11   | 1.9554(19) | Ni1–N1    | 2.082(2)   |
| Mo3–O8    | 1.932(2)   | Ni1–O1    | 2.052(2)   |
| Mo3–O15#1 | 2.4020(18) | Ni1–N4#3  | 2.179(2)   |
| Mo3–O15   | 2.0945(18) | O11–Mo2#1 | 2.3028(19) |
| Mo3–O9    | 1.686(2)   | O8–Mo4#1  | 2.3378(19) |
| Mo3–O10   | 1.763(2)   | O15–Mo3#1 | 2.4019(18) |
| Mo4–O11   | 2.0031(19) | O10–Mo1#1 | 2.248(2)   |
| Mo4–O8#1  | 2.3379(19) | N7–Ni1#4  | 2.083(2)   |
| Mo4–O15   | 2.3550(18) | N7–C9     | 1.322(3)   |
| Mo4–O14   | 1.901(2)   | N7–C8     | 1.371(4)   |
| Mo4–O13   | 1.698(2)   | N1–C2     | 1.329(4)   |
| Mo4–O12   | 1.687(2)   | N1–C1     | 1.365(4)   |
| Mo1–O5    | 1.922(2)   | N3–N2     | 1.372(4)   |
| Mo1–O3    | 1.730(2)   | N3–C2     | 1.337(4)   |
| Mo1–O15   | 2.4641(18) | N3–C3     | 1.421(3)   |

Continued on next page

Table S4 – continued from previous page

| bond      | length (Å) | bond     | length (Å) |
|-----------|------------|----------|------------|
| Mo1–O14   | 1.903(2)   | N4–Ni1#5 | 2.179(2)   |
| Mo1–O10#1 | 2.248(2)   | N4–C7    | 1.343(3)   |
| Mo1–O4    | 1.686(2)   | N4–C6    | 1.344(3)   |
| Mo2–O11#1 | 2.3027(19) | C9–N5    | 1.339(3)   |
| Mo2–O8    | 1.994(2)   | N2–C1    | 1.316(4)   |
| Mo2–O5    | 1.887(2)   | C7–C3    | 1.394(4)   |
| Mo2–O15   | 2.3249(19) | C8–N6    | 1.311(4)   |
| Mo2–O6    | 1.697(2)   | N5–N6    | 1.367(3)   |
| Mo2–O7    | 1.707(2)   | N5–C5    | 1.417(3)   |
| Ni1–O3    | 2.110(2)   | C5–C6    | 1.385(4)   |
| Ni1–N7#2  | 2.083(2)   | C5–C4    | 1.385(4)   |
| Ni1–O2    | 2.031(2)   | C3–C4    | 1.381(4)   |

<sup>1</sup> #1: 1 – X, 1 – Y, 1 – Z; #2: 3/2 – X, 2 – Y, – 1/2 + Z;  
#3: + X, 3/2 – Y, – 1/2 + Z; #4: 3/2 – X, 2 – Y, 1/2 + Z;  
#5: + X, 3/2 – Y, 1/2 + Z.

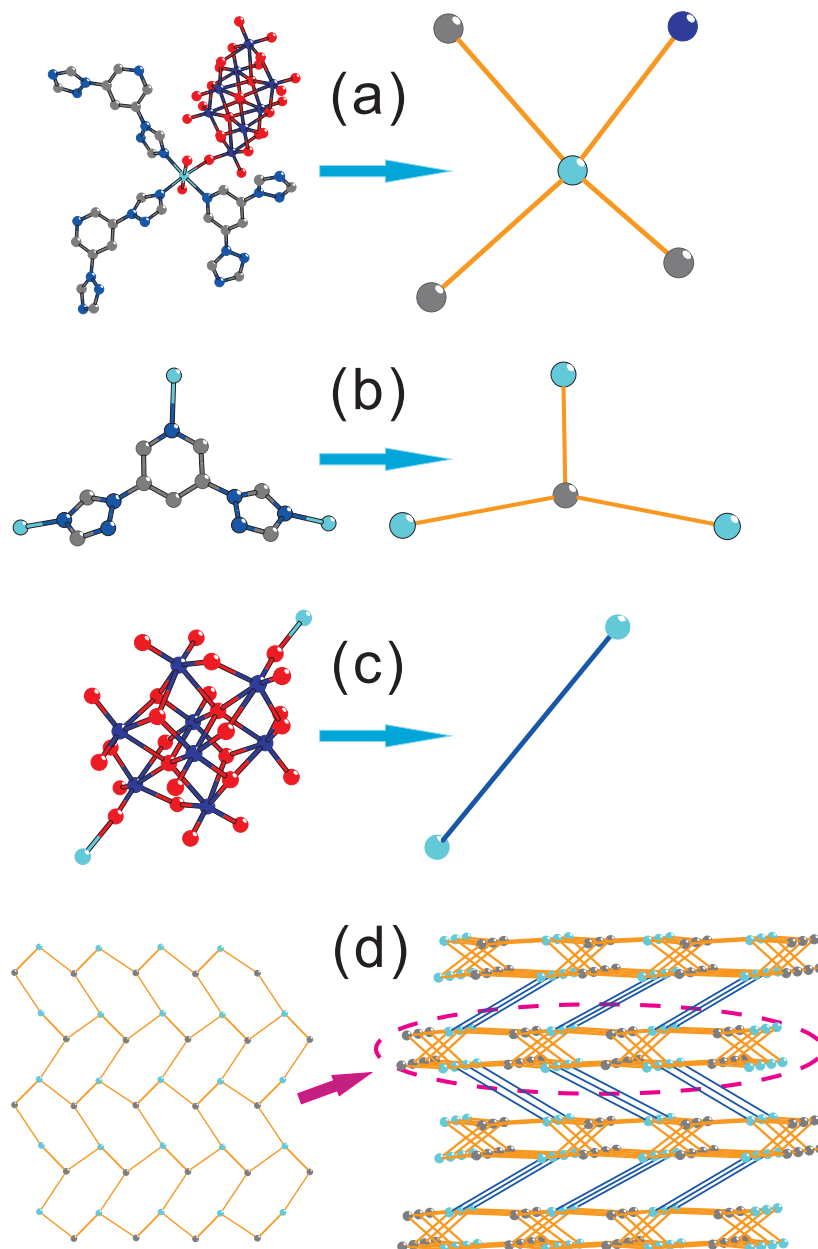

Figure S4: Abstracting the underlying topology in compound **2**. (a) Ni1 cation is regarded as a 4-connected node. (b) 3,5-Bis(1',2',4'-triazol-1'-yl)pyridine ligand can be considered as a 3-connected node. (c) The  $(\beta\text{-Mo}_8\text{O}_{26})^{4-}$  anion is considered as linkage. (d) Schematic view of the 3D (3,4)-connected framework with the  $(12)(6^3 \cdot 12^3)_2(6^3)_2$  topology in compound **2**. Color code: light green ball, 4-connected Ni(II) node; grey ball, 3-connected btap node; blue stick,  $(\beta\text{-Mo}_8\text{O}_{26})^{4-}$  anion linkage.



Table S5: Selected angles (°) of compound **2**

| angle                      | (°)        | angle                      | (°)        |
|----------------------------|------------|----------------------------|------------|
| O11–Mo3–O15                | 79.33(8)   | O2–Ni1–O3                  | 90.19(9)   |
| O11–Mo3–O15#1 <sup>1</sup> | 76.94(7)   | O2–Ni1–N7#3 <sup>1</sup>   | 91.27(9)   |
| O8–Mo3–O11                 | 150.54(8)  | O2–Ni1–N1                  | 90.05(10)  |
| O8–Mo3–O15                 | 79.61(8)   | O2–Ni1–O1                  | 176.74(9)  |
| O8–Mo3–O15#1 <sup>1</sup>  | 78.26(7)   | O2–Ni1–N4#2 <sup>1</sup>   | 88.94(9)   |
| O15–Mo3–O15#1 <sup>1</sup> | 76.39(7)   | N1–Ni1–O3                  | 91.22(8)   |
| O9–Mo3–O11                 | 101.43(10) | N1–Ni1–N7#3 <sup>1</sup>   | 93.64(9)   |
| O9–Mo3–O8                  | 102.54(10) | N1–Ni1–N4#2 <sup>1</sup>   | 174.49(9)  |
| O9–Mo3–O15#1 <sup>1</sup>  | 176.87(9)  | O1–Ni1–O3                  | 86.68(9)   |
| O9–Mo3–O15                 | 100.73(9)  | O1–Ni1–N7#3 <sup>1</sup>   | 91.93(9)   |
| O9–Mo3–O10                 | 104.28(10) | O1–Ni1–N1                  | 89.11(9)   |
| O10–Mo3–O11                | 93.78(9)   | O1–Ni1–N4#2 <sup>1</sup>   | 91.60(9)   |
| O10–Mo3–O8                 | 96.64(9)   | Mo3–O11–Mo4                | 109.09(9)  |
| O10–Mo3–O15#1 <sup>1</sup> | 78.56(8)   | Mo3–O11–Mo2#1 <sup>1</sup> | 111.56(8)  |
| O10–Mo3–O15                | 154.92(8)  | Mo4–O11–Mo2#1 <sup>1</sup> | 103.50(8)  |
| O11–Mo4–O8#1 <sup>1</sup>  | 71.54(7)   | Mo3–O8–Mo4#1 <sup>1</sup>  | 111.24(8)  |
| O11–Mo4–O15                | 72.32(7)   | Mo3–O8–Mo2                 | 108.98(9)  |
| O8#1–Mo4–O15 <sup>1</sup>  | 72.03(7)   | Mo2–O8–Mo4#1 <sup>1</sup>  | 102.56(8)  |
| O14–Mo4–O11                | 145.54(8)  | Mo2–O5–Mo1                 | 118.05(10) |
| O14–Mo4–O8#1 <sup>1</sup>  | 84.21(8)   | Mo1–O3–Ni1                 | 167.07(13) |
| O14–Mo4–O15                | 77.17(8)   | Mo3–O15–Mo3#1 <sup>1</sup> | 103.61(7)  |
| O13–Mo4–O11                | 101.67(9)  | Mo3–O15–Mo4                | 92.70(7)   |
| O13–Mo4–O8#1 <sup>1</sup>  | 87.60(9)   | Mo3–O15–Mo1                | 164.74(9)  |
| O13–Mo4–O15                | 159.63(9)  | Mo3#1–O15–Mo1 <sup>1</sup> | 91.65(6)   |
| O13–Mo4–O14                | 101.37(10) | Mo3–O15–Mo2                | 92.50(7)   |
| O12–Mo4–O11                | 95.86(10)  | Mo4–O15–Mo3#1 <sup>1</sup> | 95.87(7)   |
| O12–Mo4–O8#1 <sup>1</sup>  | 164.32(10) | Mo4–O15–Mo1                | 85.36(6)   |
| O12–Mo4–O15                | 95.60(9)   | Mo2–O15–Mo3#1 <sup>1</sup> | 96.49(7)   |
| O12–Mo4–O14                | 102.78(10) | Mo2–O15–Mo4                | 165.07(9)  |
| O12–Mo4–O13                | 104.46(12) | Mo2–O15–Mo1                | 85.94(6)   |
| O5–Mo1–O15                 | 73.79(7)   | Mo4–O14–Mo1                | 118.40(10) |
| O5–Mo1–O10#1 <sup>1</sup>  | 76.84(8)   | Mo3–O10–Mo1#1 <sup>1</sup> | 120.50(10) |
| O3–Mo1–O5                  | 97.67(10)  | C9–N7–Ni1#4 <sup>1</sup>   | 129.58(19) |
| O3–Mo1–O15                 | 93.86(8)   | C9–N7–C8                   | 103.6(2)   |
| O3–Mo1–O14                 | 98.74(9)   | C8–N7–Ni1#4 <sup>1</sup>   | 125.88(19) |
| O3–Mo1–O10#1 <sup>1</sup>  | 163.05(9)  | C2–N1–Ni1                  | 127.3(2)   |
| O14–Mo1–O5                 | 144.97(8)  | C2–N1–C1                   | 103.6(2)   |
| O14–Mo1–O15                | 74.41(7)   | C1–N1–Ni1                  | 128.97(19) |
| O14–Mo1–O10#1 <sup>1</sup> | 78.50(8)   | N2–N3–C3                   | 119.8(2)   |

Continued on next page

Table S5 – continued from previous page

| angle                      | (°)        | angle                    | (°)        |
|----------------------------|------------|--------------------------|------------|
| O10#1–Mo1–O15 <sup>1</sup> | 69.24(7)   | C2–N3–N2                 | 110.1(2)   |
| O4–Mo1–O5                  | 101.33(11) | C2–N3–C3                 | 130.1(3)   |
| O4–Mo1–O3                  | 106.13(11) | C7–N4–Ni1#5 <sup>1</sup> | 124.91(19) |
| O4–Mo1–O15                 | 159.95(10) | C7–N4–C6                 | 118.8(2)   |
| O4–Mo1–O14                 | 103.49(11) | C6–N4–Ni1#5 <sup>1</sup> | 115.64(18) |
| O4–Mo1–O10#1 <sup>1</sup>  | 90.74(10)  | N7–C9–N5                 | 109.4(2)   |
| O11#1–Mo2–O15 <sup>1</sup> | 72.40(6)   | C1–N2–N3                 | 102.6(3)   |
| O8–Mo2–O11#1 <sup>1</sup>  | 72.47(7)   | N1–C2–N3                 | 109.5(3)   |
| O8–Mo2–O15                 | 72.94(7)   | N4–C7–C3                 | 121.0(2)   |
| O5–Mo2–O11#1 <sup>1</sup>  | 84.91(8)   | N6–C8–N7                 | 114.1(3)   |
| O5–Mo2–O8                  | 147.23(8)  | N2–C1–N1                 | 114.3(3)   |
| O5–Mo2–O15                 | 77.85(8)   | C9–N5–N6                 | 110.2(2)   |
| O6–Mo2–O11#1 <sup>1</sup>  | 86.35(9)   | C9–N5–C5                 | 129.1(2)   |
| O6–Mo2–O8                  | 101.52(10) | N6–N5–C5                 | 120.4(2)   |
| O6–Mo2–O5                  | 100.32(10) | C8–N6–N5                 | 102.7(2)   |
| O6–Mo2–O15                 | 158.75(9)  | C6–C5–N5                 | 119.7(2)   |
| O6–Mo2–O7                  | 104.70(12) | C4–C5–N5                 | 119.7(2)   |
| O7–Mo2–O11#1 <sup>1</sup>  | 165.73(10) | C4–C5–C6                 | 120.5(2)   |
| O7–Mo2–O8                  | 96.14(10)  | N4–C6–C5                 | 121.9(2)   |
| O7–Mo2–O5                  | 101.59(10) | C7–C3–N3                 | 119.8(2)   |
| O7–Mo2–O15                 | 96.36(10)  | C4–C3–N3                 | 119.1(2)   |
| O3–Ni1–N4#2 <sup>1</sup>   | 83.36(8)   | C4–C3–C7                 | 121.1(2)   |
| N7#3–Ni1–O3 <sup>1</sup>   | 174.92(9)  | C3–C4–C5                 | 116.6(3)   |
| N7#3–Ni1–N4#2 <sup>1</sup> | 91.80(9)   |                          |            |

<sup>1</sup> #1: 1 – X, 1 – Y, 1 – Z; #2: 3/2 – X, 2 – Y, – 1/2 + Z;  
#3: + X, 3/2 – Y, – 1/2 + Z; #4: 3/2 – X, 2 – Y, 1/2 + Z;  
#5: + X, 3/2 – Y, 1/2 + Z.

### 3.3. Crystal Structure of Compound **3**

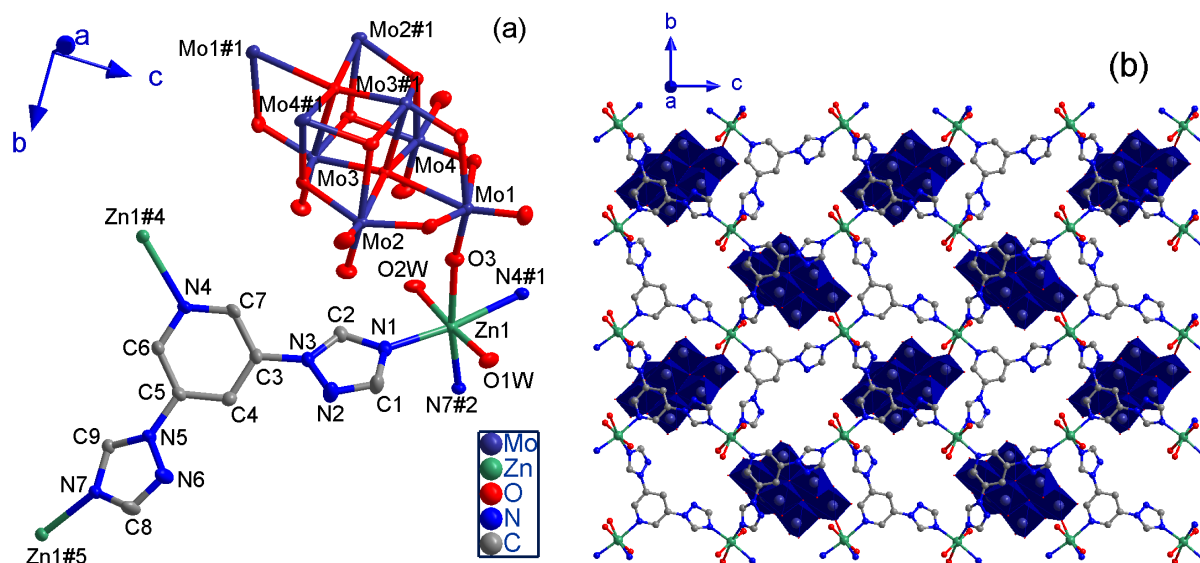

Figure S5: (a) Coordination environment (at 50 % probability level) of the Zn(II) centers in compound **3**. The hydrogen atoms and crystal water molecules are omitted for clarity. Symmetry codes for the generated atoms: #1:  $2 - X, - Y, 1 - Z$ ; #2:  $3/2 - X, 1 - Y, - 1/2 + Z$ ; #3:  $+ X, 1/2 - Y, - 1/2 + Z$ ; #4:  $3/2 - X, 1 - Y, 1/2 + Z$ ; #5:  $+ X, 1/2 - Y, 1/2 + Z$ . (b) Perspective view of the 3D framework in compound **3** along the *a*-axis.

Table S6: Selected bond lengths (Å) of compound **3**

| bond      | length (Å) | bond      | length (Å) |
|-----------|------------|-----------|------------|
| Mo3–O11   | 1.9554(19) | Zn1–N1    | 2.082(2)   |
| Mo3–O8    | 1.932(2)   | Zn1–O1    | 2.052(2)   |
| Mo3–O15#1 | 2.4020(18) | Zn1–N4#3  | 2.179(2)   |
| Mo3–O15   | 2.0945(18) | O11–Mo2#1 | 2.3028(19) |
| Mo3–O9    | 1.686(2)   | O8–Mo4#1  | 2.3378(19) |
| Mo3–O10   | 1.763(2)   | O15–Mo3#1 | 2.4019(18) |
| Mo4–O11   | 2.0031(19) | O10–Mo1#1 | 2.248(2)   |
| Mo4–O8#1  | 2.3379(19) | N7–Zn1#4  | 2.083(2)   |
| Mo4–O15   | 2.3550(18) | N7–C9     | 1.322(3)   |
| Mo4–O14   | 1.901(2)   | N7–C8     | 1.371(4)   |
| Mo4–O13   | 1.698(2)   | N1–C2     | 1.329(4)   |
| Mo4–O12   | 1.687(2)   | N1–C1     | 1.365(4)   |
| Mo1–O5    | 1.922(2)   | N3–N2     | 1.372(4)   |
| Mo1–O3    | 1.730(2)   | N3–C2     | 1.337(4)   |
| Mo1–O15   | 2.4641(18) | N3–C3     | 1.421(3)   |

Continued on next page

Table S6 – continued from previous page

| bond      | length (Å) | bond     | length (Å) |
|-----------|------------|----------|------------|
| Mo1–O14   | 1.903(2)   | N4–Zn1#5 | 2.179(2)   |
| Mo1–O10#1 | 2.248(2)   | N4–C7    | 1.343(3)   |
| Mo1–O4    | 1.686(2)   | N4–C6    | 1.344(3)   |
| Mo2–O11#1 | 2.3027(19) | C9–N5    | 1.339(3)   |
| Mo2–O8    | 1.994(2)   | N2–C1    | 1.316(4)   |
| Mo2–O5    | 1.887(2)   | C7–C3    | 1.394(4)   |
| Mo2–O15   | 2.3249(19) | C8–N6    | 1.311(4)   |
| Mo2–O6    | 1.697(2)   | N5–N6    | 1.367(3)   |
| Mo2–O7    | 1.707(2)   | N5–C5    | 1.417(3)   |
| Zn1–O3    | 2.110(2)   | C5–C6    | 1.385(4)   |
| Zn1–N7#2  | 2.083(2)   | C5–C4    | 1.385(4)   |
| Zn1–O2    | 2.031(2)   | C3–C4    | 1.381(4)   |

<sup>1</sup> #1: 1 – X, 1 – Y, 1 – Z; #2: 3/2 – X, 2 – Y, – 1/2 + Z;  
#3: + X, 3/2 – Y, – 1/2 + Z; #4: 3/2 – X, 2 – Y, 1/2 + Z;  
#5: + X, 3/2 – Y, 1/2 + Z.

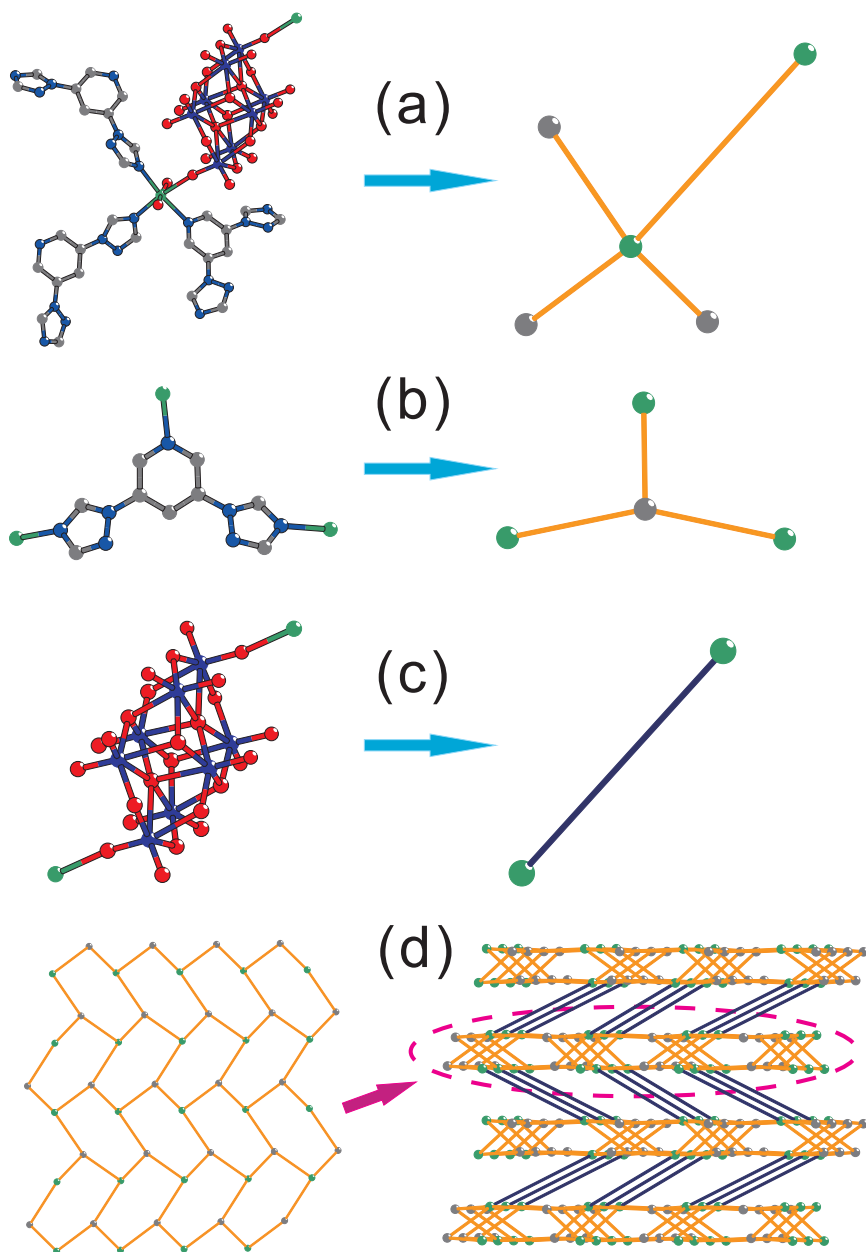

Figure S6: Abstracting the underlying topology in compound **3**. (a) Zn1 cation is regarded as a 4-connected node. (b) 3,5-Bis(1',2',4'-triazol-1'-yl)pyridine ligand can be considered as a 3-connected node. (c) The  $(\beta\text{-Mo}_8\text{O}_{26})^{4-}$  anion is considered as linkage. (d) Schematic view of the 3D (3,4)-connected framework with the  $(12)(6^3 \cdot 12^3)_2(6^3)_2$  topology in compound **3**. Color code: green ball, 4-connected Zn(II) node; grey ball, 3-connected btap node; blue stick,  $(\beta\text{-Mo}_8\text{O}_{26})^{4-}$  anion linkage.

Table S7: Selected angles (°) of compound **3**

| angle                      | (°)        | angle                      | (°)        |
|----------------------------|------------|----------------------------|------------|
| O11–Mo3–O15                | 79.33(8)   | O2–Zn1–O3                  | 90.19(9)   |
| O11–Mo3–O15#1 <sup>1</sup> | 76.94(7)   | O2–Zn1–N7#3 <sup>1</sup>   | 91.27(9)   |
| O8–Mo3–O11                 | 150.54(8)  | O2–Zn1–N1                  | 90.05(10)  |
| O8–Mo3–O15                 | 79.61(8)   | O2–Zn1–O1                  | 176.74(9)  |
| O8–Mo3–O15#1 <sup>1</sup>  | 78.26(7)   | O2–Zn1–N4#2 <sup>1</sup>   | 88.94(9)   |
| O15–Mo3–O15#1 <sup>1</sup> | 76.39(7)   | N1–Zn1–O3                  | 91.22(8)   |
| O9–Mo3–O11                 | 101.43(10) | N1–Zn1–N7#3 <sup>1</sup>   | 93.64(9)   |
| O9–Mo3–O8                  | 102.54(10) | N1–Zn1–N4#2 <sup>1</sup>   | 174.49(9)  |
| O9–Mo3–O15#1 <sup>1</sup>  | 176.87(9)  | O1–Zn1–O3                  | 86.68(9)   |
| O9–Mo3–O15                 | 100.73(9)  | O1–Zn1–N7#3 <sup>1</sup>   | 91.93(9)   |
| O9–Mo3–O10                 | 104.28(10) | O1–Zn1–N1                  | 89.11(9)   |
| O10–Mo3–O11                | 93.78(9)   | O1–Zn1–N4#2 <sup>1</sup>   | 91.60(9)   |
| O10–Mo3–O8                 | 96.64(9)   | Mo3–O11–Mo4                | 109.09(9)  |
| O10–Mo3–O15#1 <sup>1</sup> | 78.56(8)   | Mo3–O11–Mo2#1 <sup>1</sup> | 111.56(8)  |
| O10–Mo3–O15                | 154.92(8)  | Mo4–O11–Mo2#1 <sup>1</sup> | 103.50(8)  |
| O11–Mo4–O8#1 <sup>1</sup>  | 71.54(7)   | Mo3–O8–Mo4#1 <sup>1</sup>  | 111.24(8)  |
| O11–Mo4–O15                | 72.32(7)   | Mo3–O8–Mo2                 | 108.98(9)  |
| O8#1–Mo4–O15 <sup>1</sup>  | 72.03(7)   | Mo2–O8–Mo4#1 <sup>1</sup>  | 102.56(8)  |
| O14–Mo4–O11                | 145.54(8)  | Mo2–O5–Mo1                 | 118.05(10) |
| O14–Mo4–O8#1 <sup>1</sup>  | 84.21(8)   | Mo1–O3–Zn1                 | 167.07(13) |
| O14–Mo4–O15                | 77.17(8)   | Mo3–O15–Mo3#1 <sup>1</sup> | 103.61(7)  |
| O13–Mo4–O11                | 101.67(9)  | Mo3–O15–Mo4                | 92.70(7)   |
| O13–Mo4–O8#1 <sup>1</sup>  | 87.60(9)   | Mo3–O15–Mo1                | 164.74(9)  |
| O13–Mo4–O15                | 159.63(9)  | Mo3#1–O15–Mo1 <sup>1</sup> | 91.65(6)   |
| O13–Mo4–O14                | 101.37(10) | Mo3–O15–Mo2                | 92.50(7)   |
| O12–Mo4–O11                | 95.86(10)  | Mo4–O15–Mo3#1 <sup>1</sup> | 95.87(7)   |
| O12–Mo4–O8#1 <sup>1</sup>  | 164.32(10) | Mo4–O15–Mo1                | 85.36(6)   |
| O12–Mo4–O15                | 95.60(9)   | Mo2–O15–Mo3#1 <sup>1</sup> | 96.49(7)   |
| O12–Mo4–O14                | 102.78(10) | Mo2–O15–Mo4                | 165.07(9)  |
| O12–Mo4–O13                | 104.46(12) | Mo2–O15–Mo1                | 85.94(6)   |
| O5–Mo1–O15                 | 73.79(7)   | Mo4–O14–Mo1                | 118.40(10) |
| O5–Mo1–O10#1 <sup>1</sup>  | 76.84(8)   | Mo3–O10–Mo1#1 <sup>1</sup> | 120.50(10) |
| O3–Mo1–O5                  | 97.67(10)  | C9–N7–Zn1#4 <sup>1</sup>   | 129.58(19) |
| O3–Mo1–O15                 | 93.86(8)   | C9–N7–C8                   | 103.6(2)   |
| O3–Mo1–O14                 | 98.74(9)   | C8–N7–Zn1#4 <sup>1</sup>   | 125.88(19) |
| O3–Mo1–O10#1 <sup>1</sup>  | 163.05(9)  | C2–N1–Zn1                  | 127.3(2)   |
| O14–Mo1–O5                 | 144.97(8)  | C2–N1–C1                   | 103.6(2)   |
| O14–Mo1–O15                | 74.41(7)   | C1–N1–Zn1                  | 128.97(19) |
| O14–Mo1–O10#1 <sup>1</sup> | 78.50(8)   | N2–N3–C3                   | 119.8(2)   |

Continued on next page

Table S7 – continued from previous page

| angle                      | (°)        | angle                    | (°)        |
|----------------------------|------------|--------------------------|------------|
| O10#1–Mo1–O15 <sup>1</sup> | 69.24(7)   | C2–N3–N2                 | 110.1(2)   |
| O4–Mo1–O5                  | 101.33(11) | C2–N3–C3                 | 130.1(3)   |
| O4–Mo1–O3                  | 106.13(11) | C7–N4–Zn1#5 <sup>1</sup> | 124.91(19) |
| O4–Mo1–O15                 | 159.95(10) | C7–N4–C6                 | 118.8(2)   |
| O4–Mo1–O14                 | 103.49(11) | C6–N4–Zn1#5 <sup>1</sup> | 115.64(18) |
| O4–Mo1–O10#1 <sup>1</sup>  | 90.74(10)  | N7–C9–N5                 | 109.4(2)   |
| O11#1–Mo2–O15 <sup>1</sup> | 72.40(6)   | C1–N2–N3                 | 102.6(3)   |
| O8–Mo2–O11#1 <sup>1</sup>  | 72.47(7)   | N1–C2–N3                 | 109.5(3)   |
| O8–Mo2–O15                 | 72.94(7)   | N4–C7–C3                 | 121.0(2)   |
| O5–Mo2–O11#1 <sup>1</sup>  | 84.91(8)   | N6–C8–N7                 | 114.1(3)   |
| O5–Mo2–O8                  | 147.23(8)  | N2–C1–N1                 | 114.3(3)   |
| O5–Mo2–O15                 | 77.85(8)   | C9–N5–N6                 | 110.2(2)   |
| O6–Mo2–O11#1 <sup>1</sup>  | 86.35(9)   | C9–N5–C5                 | 129.1(2)   |
| O6–Mo2–O8                  | 101.52(10) | N6–N5–C5                 | 120.4(2)   |
| O6–Mo2–O5                  | 100.32(10) | C8–N6–N5                 | 102.7(2)   |
| O6–Mo2–O15                 | 158.75(9)  | C6–C5–N5                 | 119.7(2)   |
| O6–Mo2–O7                  | 104.70(12) | C4–C5–N5                 | 119.7(2)   |
| O7–Mo2–O11#1 <sup>1</sup>  | 165.73(10) | C4–C5–C6                 | 120.5(2)   |
| O7–Mo2–O8                  | 96.14(10)  | N4–C6–C5                 | 121.9(2)   |
| O7–Mo2–O5                  | 101.59(10) | C7–C3–N3                 | 119.8(2)   |
| O7–Mo2–O15                 | 96.36(10)  | C4–C3–N3                 | 119.1(2)   |
| O3–Zn1–N4#2 <sup>1</sup>   | 83.36(8)   | C4–C3–C7                 | 121.1(2)   |
| N7#3–Zn1–O3 <sup>1</sup>   | 174.92(9)  | C3–C4–C5                 | 116.6(3)   |
| N7#3–Zn1–N4#2 <sup>1</sup> | 91.80(9)   |                          |            |

<sup>1</sup> #1: 1 – X, 1 – Y, 1 – Z; #2: 3/2 – X, 2 – Y, – 1/2 + Z;  
#3: + X, 3/2 – Y, – 1/2 + Z; #4: 3/2 – X, 2 – Y, 1/2 + Z;  
#5: + X, 3/2 – Y, 1/2 + Z.

#### 4. PXRD, FT-IR, Raman and TGA

Only large crystals of these POMOFs were manually selected through a microscope for characterization and electrochemical experiments. The PXRD patterns of compounds **1**, **2** and **3**, and the thermal derivatives of compounds **1** and **2**, were shown in Fig. S7, S11 and S12, respectively. All reflection peaks of compounds **1**, **2** and **3** were in good agreement with the corresponding simulated patterns without additional peaks, indicating the high purity of these compounds. The difference in intensities could be due to the preferred orientation in the powder samples.

In the FT-IR spectra of compounds **1**, **2** and **3** (Fig. S8), the peaks in a low wavenumber region of 957 – 550 cm<sup>-1</sup> were assigned to Mo–O–Mo of the ( $\beta$ -Mo<sub>8</sub>O<sub>26</sub>)<sup>4-</sup> polyoxoanion.

The bands at 1700 – 1300  $\text{cm}^{-1}$  can be ascribed to the stretching vibrations of  $\nu_{\text{as}}$  (C=C) and  $\nu_{\text{as}}$  (C=N) in btap ligand. Vibrational absorption of C=N in btap ligand appeared near 730  $\text{cm}^{-1}$ . The broad absorption peaks near 3400  $\text{cm}^{-1}$  should be attributed to the vibration of  $\nu$  (OH) of water molecules. The FT-IR spectra of the thermal derivatives of compounds **1** and **2** were shown in Fig. S13.

TGA in  $\text{N}_2$  atmosphere with a heating rate of 10  $^\circ\text{C min}^{-1}$  was employed to investigate the thermal stability of the POMOFs. The TG curve of compound **1** (Fig. S10(a)) showed a weight loss of 7.1 % below 340  $^\circ\text{C}$ , attributable to the loss of lattice and coordinated water molecules, and in the range of 340 – 606  $^\circ\text{C}$ , 38.8 % of the weight loss could be attributed to the framework collapse of compound **1**, except that weight gain began at 606  $^\circ\text{C}$ , as cobalt tetroxide and cobalt trioxide gradually decomposed into denser cobalt(II) oxide. As illustrated in Fig. S10(b), the weight loss of 8.0 % within the temperature range of 56 – 350  $^\circ\text{C}$  can be attributed to the loss of lattice and coordination water molecules. In the temperature range of 350 – 574  $^\circ\text{C}$ , a weight loss of 39.2 % can be attributed to the skeleton collapse of compound **2**, resulting in the formation of molybdenum and nickel oxides as the final products. Similarly, 8.9 % of the weight loss of compound **3** (Fig. S10(c)) in the temperature range of 50 – 310  $^\circ\text{C}$  was attributed to the loss of water molecules, and 41.3 % of the weight loss in the range of 310 – 740  $^\circ\text{C}$  can be attributed to the collapse of the skeleton of compound **3**, with molybdenum oxide and zinc oxide as the final products.

The phase compositions of Co/Ni-POMOF-T were determined by PXRD. As shown in Fig. 2(a), for Co-POMOF-700, three peaks of  $\text{Mo}_2\text{N}$  (JCPDS no. 25-1626) at 37.1 $^\circ$ , 43.1 $^\circ$  and 62.6 $^\circ$  were indexed to (1 1 1), (2 0 0) and (2 2 0) lattice diffraction planes. In addition, there existed another material phase of  $\text{Mo}_2\text{N}$  (JCPDS no. 24-0768), whose diffraction peaks were mainly located at 37.9 $^\circ$  (1 1 2 plane), 40.1 $^\circ$  (1 0 3 plane), 45.3 $^\circ$  (0 0 4 plane), 62.6 $^\circ$  (2 2 0 plane) and 75.3 $^\circ$  (3 1 2 plane). The diffraction peaks of  $\text{Co}_3\text{Mo}_3\text{N}$  were mainly distributed at 35.5 $^\circ$  (3 3 1 plane), 40.0 $^\circ$  (4 2 2 plane), 42.6 $^\circ$  (5 1 1 plane), 46.6 $^\circ$  (4 4 0 plane), 55.2 $^\circ$  (6 2 2 plane), 59.8 $^\circ$  (5 5 1 plane), 69.7 $^\circ$  (7 3 3 plane), 72.7 $^\circ$  (8 2 2 plane) and 77.3 $^\circ$  (8 4 0 plane), indicating the existed  $\text{Co}_3\text{Mo}_3\text{N}$  species in Co-POMOF-700. Furthermore, the peaks of  $\text{Mo}_2\text{C}$  were located at 34.5 $^\circ$  (1 0 0 plane), 38 $^\circ$  (0 0 2 plane), 39.6 $^\circ$  (1 0 1 plane), 52.3 $^\circ$  (1 0 2 plane), 61.9 $^\circ$  (1 1 0 plane), 69.8 $^\circ$  (1 0 3 plane), 75 $^\circ$  (1 1 2 plane) and 76 $^\circ$  (2 0 1 plane). Nevertheless, Co-POMOF-800/900/1000 were different from Co-POMOF-700, consisting of  $\text{MoO}_2$  (JCPDS no. 25-1626),  $\text{Co}_2\text{Mo}_3\text{N}$  (JCPDS no. 09-6417) and  $\text{Mo}_2\text{N}$  (JCPDS no. 25-1626) (Fig. S11).

As shown in Fig. S12(a), Ni-POMOF-900 contained mainly four types of phases, consisting of Mo,  $\text{Mo}_2\text{C}$ ,  $\text{Ni}_2\text{Mo}_3\text{N}$  and  $\text{Mo}_2\text{N}$ , in addition to small amounts of  $\text{MoO}_2$ . The diffraction peaks of  $\text{Mo}_2\text{N}$  (JCPDS no. 25-1626) were 37.17 $^\circ$  (1 1 1 plane), 41.1 $^\circ$  (2 0 0 plane) and 62.6 $^\circ$  (2 2 0 plane). Furthermore, the peak intensity of  $\text{Mo}_2\text{N}$  was low, indicating a lower content. The diffraction peaks of  $\text{Ni}_2\text{Mo}_3\text{N}$  (JCPDS no. 89-4564) were mainly distributed at 30.1 $^\circ$  (2 1 0 plane), 40.8 $^\circ$  (2 2 1 plane), 43.1 $^\circ$  (3 1 0 plane), 45.3 $^\circ$  (3 1 1 plane), 59.1 $^\circ$  (3 3 0 plane), 66 $^\circ$  (3 3 2 plane), 69.3 $^\circ$  (4 2 2 plane), 71 $^\circ$  (4 3 0 plane), 72.6 $^\circ$  (5 1 0 plane) and 77.4 $^\circ$  (5 2 0 plane). The peaks of  $\text{Mo}_2\text{C}$  (JCPDS no. 65-8766) were located at 34.5 $^\circ$  (1 0 0 plane), 38 $^\circ$  (0 0 2 plane), 39.6 $^\circ$  (1 0 1 plane), 52.3 $^\circ$  (1 0 2 plane), 61.9 $^\circ$  (1 1 0 plane), 69.8 $^\circ$  (1 0 3 plane), 75 $^\circ$  (1 1 2 plane) and 76 $^\circ$  (2 0 1 plane). Fig. S12(b) showed the



PXRD patterns of Ni-POMOF-700/800 including MoO<sub>2</sub>, Ni<sub>2</sub>Mo<sub>3</sub>N and Mo<sub>2</sub>C. However, Ni-POMOF-1000 did not exhibit Ni<sub>2</sub>Mo<sub>3</sub>N phase, but only the most significant peaks of MoO<sub>2</sub> phase, which may be the result of the high pyrolysis temperature, causing the destruction of the phase into amorphous [13, 14]. The Si peaks (Fig. S11 and S12(b)) were from the silicon substrates used for the PXRD experiments.

The Raman spectra of compounds **1**, **2** and **3**, and the thermal derivatives of compounds **1** and **2**, were shown in Fig. S9, S14 and S15, respectively. The D<sub>1</sub> band generally represented the defects and distortion of the carbon layer, while the G band indicated the degree of crystalline and graphitization [15]. Besides, the deconvoluted Raman spectra also included the presence of D<sub>5</sub>, D<sub>4</sub>, D<sub>3</sub> and D<sub>2</sub> bands at 1210, 1420, 1510 and 1770 cm<sup>-1</sup> (Table S8) [15], respectively. The integrated ratio of D<sub>1</sub> and G band ( $I_{D1}/I_G$ ) indicated the degree of defects on the carbon layer of the composites, and  $I_G/I_{All}$  represented the degree of graphitization. Usually, the value of  $I_{D1}/I_G$  increased with the pyrolysis temperature, denoting that the degree of collapse of the compounds increased. It was observed that the  $I_{D1}/I_G$  values of the thermal derivatives corresponding to Co-POMOF at 700, 800 and 900 °C were 1.043, 1.046 and 1.073, respectively, which implies that the degree of defects did not differ much (Fig. S14(a – c)). The  $I_{D1}/I_G$  value of Co-POMOF-1000 was 0.775 (Fig. S14(d)), which showed a significant decrease in the degree of defects. The value of  $I_G/I_{All}$  for Co-POMOF-T increased with the pyrolysis temperature, which indicated that the degree of graphitization increased. However, the value of  $I_G/I_{All}$  for Ni-POMOF-900 was 0.168 (Fig. S15), suggesting that it was the least graphitized in Ni-POMOF-T.

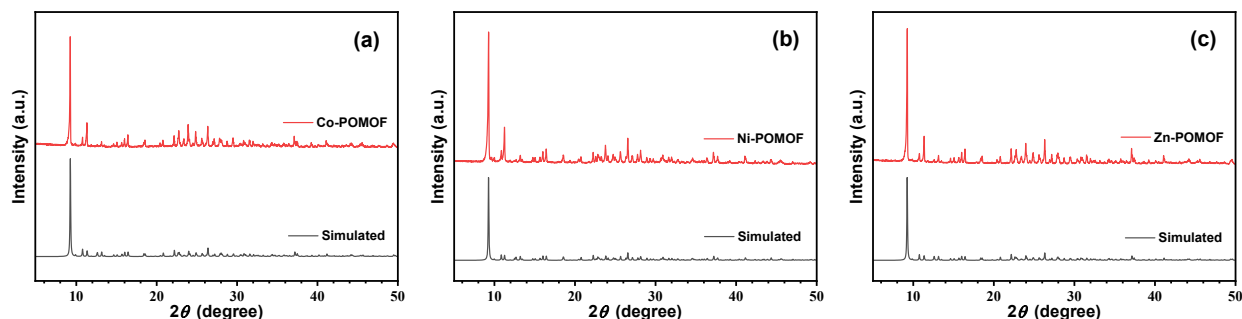

Figure S7: The experimental PXRD patterns versus the simulated patterns of compounds (a) **1**, (b) **2** and (c) **3**.

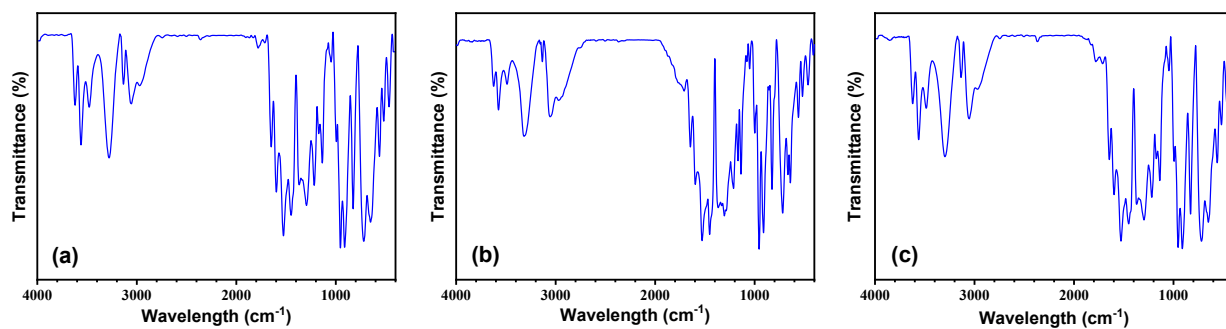

Figure S8: FT-IR spectra of (a) **1**, (b) **2** and (c) **3**.

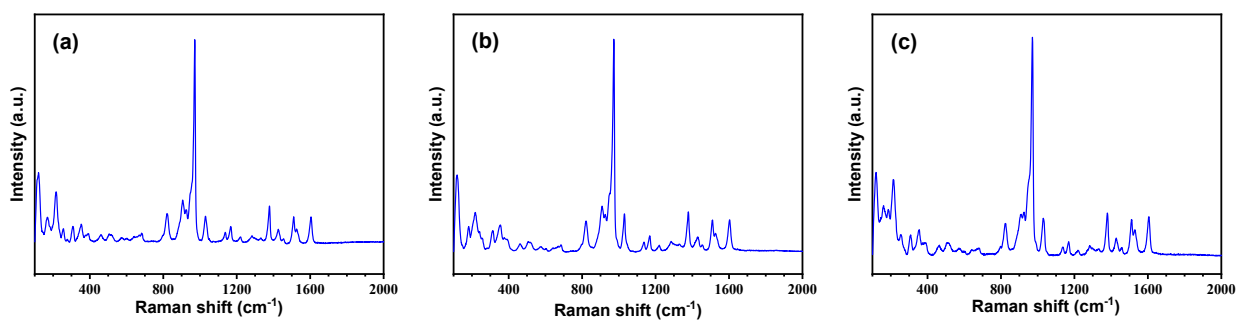

Figure S9: Raman spectra of (a) **1**, (b) **2** and (c) **3**.

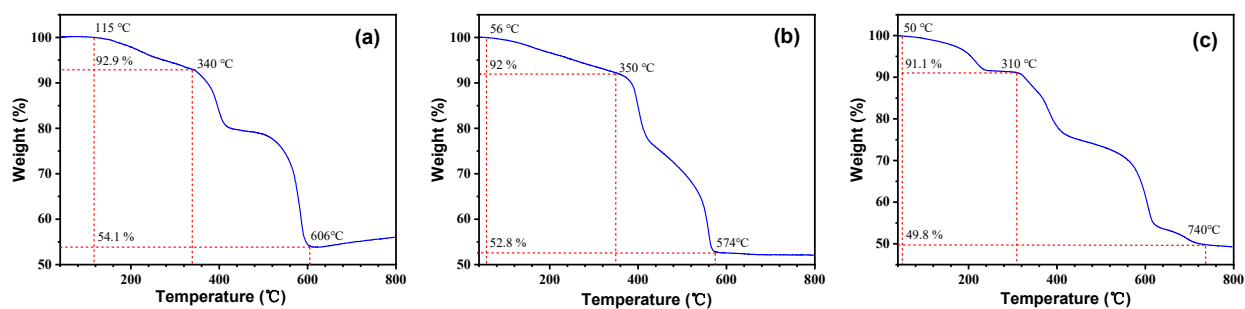

Figure S10: TG curves of (a) **1**, (b) **2** and (c) **3**.

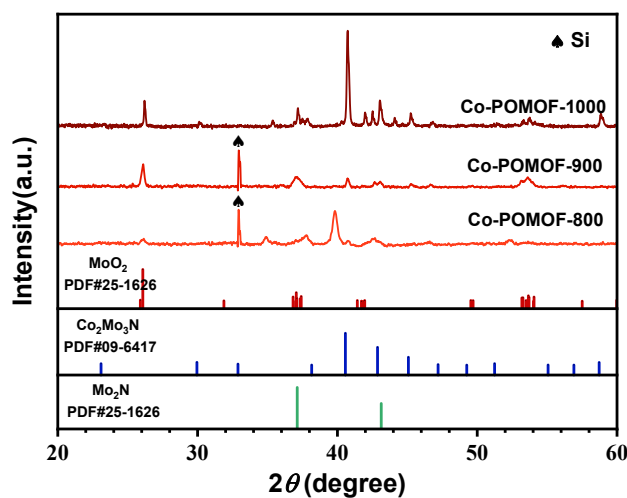

Figure S11: PXRD patterns of Co-POMOF-800, Co-POMOF-900 and Co-POMOF-1000.

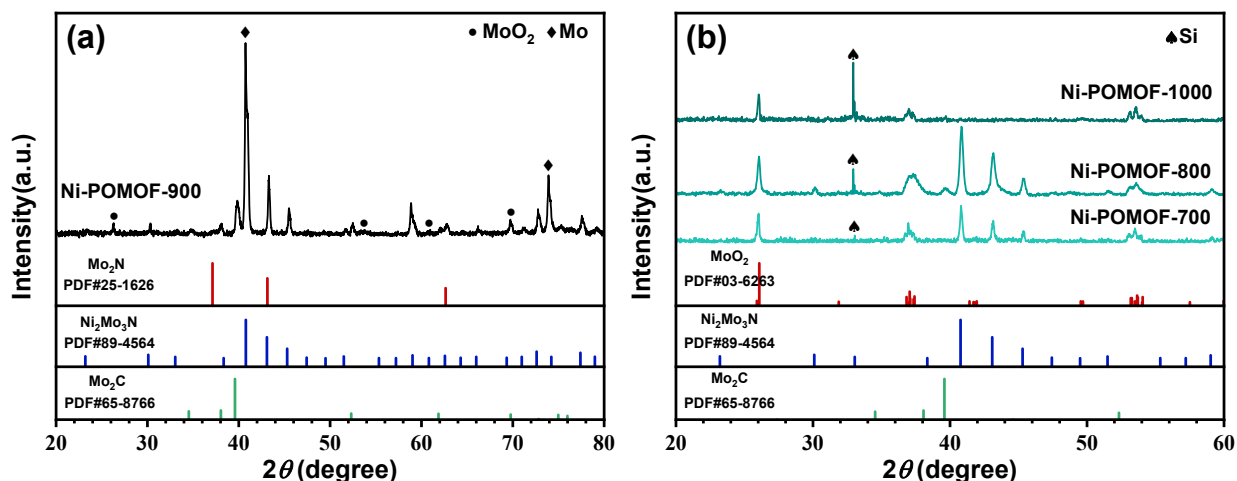

Figure S12: PXRD patterns of (a) Ni-POMOF-900, and (b) Ni-POMOF-700, Ni-POMOF-800 and Ni-POMOF-1000.

Table S8: The main functional groups determined by Raman spectroscopy and the deconvoluted Raman spectra

| Band           | Raman shift ( $\text{cm}^{-1}$ ) | Vibration mode <sup>a</sup>                                                                            |
|----------------|----------------------------------|--------------------------------------------------------------------------------------------------------|
| D <sub>5</sub> | 1190 – 1210                      | the disordered graphitic lattice                                                                       |
| D <sub>1</sub> | 1320 – 1340                      | in-plane imperfections in such as defects in graphitic lattice or graphene layers and heteroatoms [15] |
| D <sub>4</sub> | 1400 – 1420                      | amorphous carbon (Gaussian line shape)                                                                 |
| D <sub>3</sub> | 1480 – 1510                      | amorphous carbon (Gaussian line shape) [16]                                                            |
| G              | 1580 – 1590                      | planar asymmetric stretching vibrations of C=C bonds ( $E_{2g}$ symmetry)                              |
| D <sub>2</sub> | 1750 – 1770                      | amorphous carbon (Gaussian line shape)                                                                 |

<sup>a</sup> Vibration mode from Co-POMOF-700/800/900 and Ni-POMOF-T.

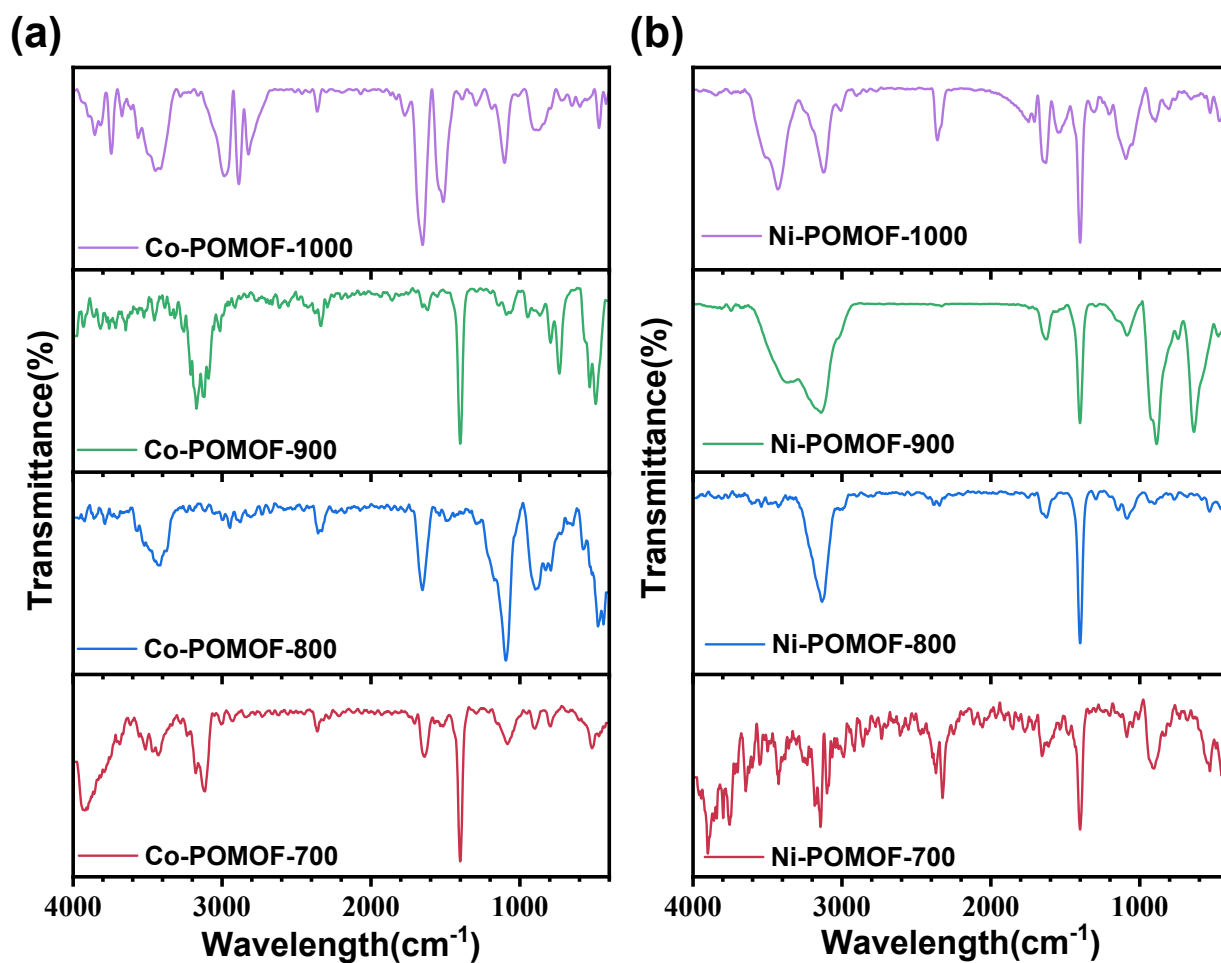

Figure S13: FT-IR spectra of (a) Co-POMOF-700, Co-POMOF-800, Co-POMOF-900 and Co-POMOF-1000, and (b) Ni-POMOF-700, Ni-POMOF-800, Ni-POMOF-900 and Ni-POMOF-1000.

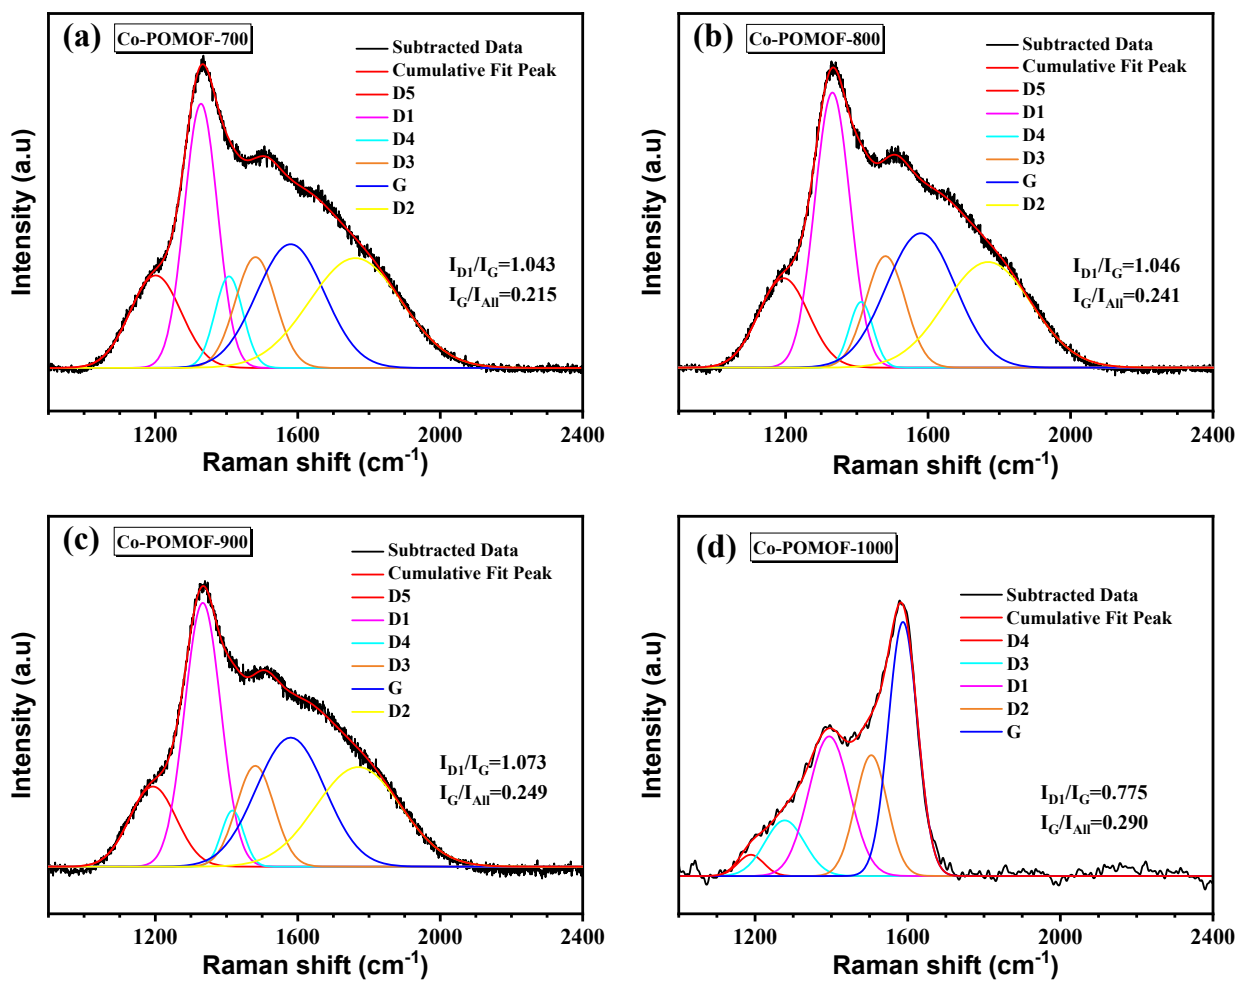

Figure S14: Raman spectra of (a) Co-POMOF-700, (b) Co-POMOF-800, (c) Co-POMOF-900 and (d) Co-POMOF-1000.

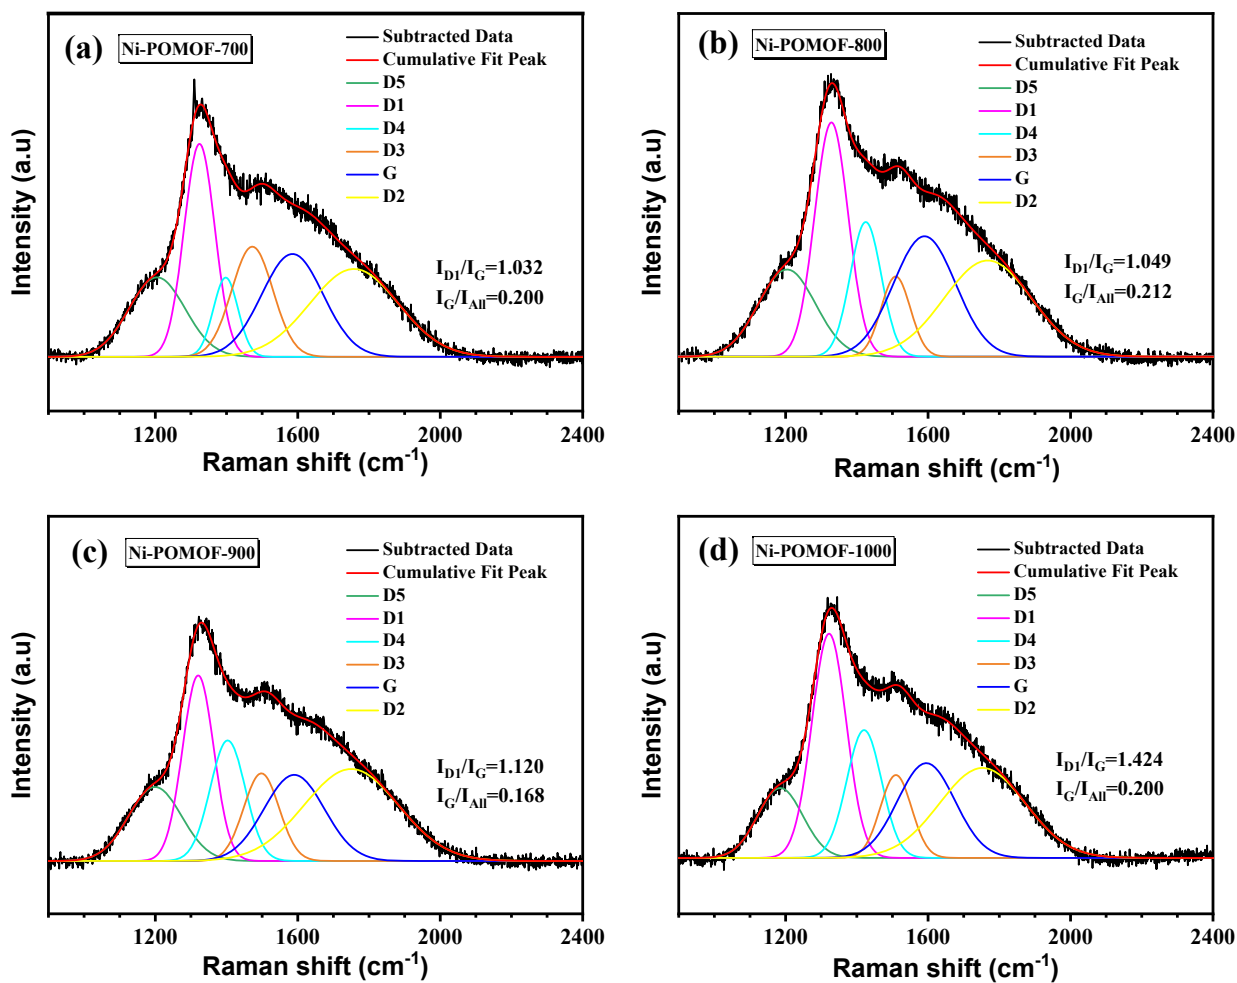

Figure S15: Raman spectra of (a) Ni-POMOF-700, (b) Ni-POMOF-800, (c) Ni-POMOF-900 and (d) Ni-POMOF-1000.

## 5. SEM, TEM and XPS

The catalysts prepared by Co-POMOF after calcination at 700 °C for 2 h showed a block structure with irregular shape and more nanoscale particles on the surface (Fig. S17(a,b)). In contrast, Ni-POMOF-900 had larger lumps and flatter surfaces, partly showing a distinct layer structure and fewer nanoscale particles on the surface (Fig. S17(c,d)).

Fig. S18(a – c) showed high resolution TEM images of Ni-POMOF-900. The lattice fringes with interlayer spacing of 0.245 nm was assigned to the (1 1 1 plane) of cubic Mo<sub>2</sub>C structure (Fig. S18(b)), while the distances of 0.236 nm corresponded to the (0 0 2 plane) of hexagonal Mo<sub>2</sub>C structure (Fig. S18(c)) [17]. In addition, four lattice fringes with lattice spacings of 0.221, 0.210, 0.242 and 0.212 nm were shown, corresponding to the (2 2 1) and (3 1 0) planes of Ni<sub>2</sub>Mo<sub>3</sub>N, and the (1 1 1) and (2 0 0) planes of Mo<sub>2</sub>N, respectively (Fig. S18(b,c)). Fig. S18(d – i) showed the mapping images of Ni-POMOF-900. It can be seen that Ni, Mo, N, O and C elements were evenly distributed.

Through the analysis of OER performance of Co/Ni-POMOF-T series materials ( $T = 700/800/900/1000$  °C), it was found that Co-POMOF-700 and Ni-POMOF-900 exhibited superior performance. As the calcination temperature of the Co/Ni-POMOF-T series materials increased, different inorganic compounds and phase transitions were observed. For example, Co<sub>3</sub>Mo<sub>3</sub>N in Co-POMOF-700 gradually transformed into Co<sub>2</sub>Mo<sub>3</sub>N with increasing temperature. This phase transition directly impacted the catalytic performance, possibly due to the lower catalytic activity of Co<sub>2</sub>Mo<sub>3</sub>N phase, while Co<sub>3</sub>Mo<sub>3</sub>N phase demonstrated better catalytic performance in OER. Similarly, in the Ni-POMOF-T series materials, as the temperature increased, the characteristic peak of Ni<sub>2</sub>Mo<sub>3</sub>N gradually intensified, and Ni<sub>2</sub>Mo<sub>3</sub>N was no longer dominant at 1000 °C. Through HR-TEM analysis, we further identified the lattice fringes of different phases, such as Ni<sub>3</sub>Mo<sub>3</sub>N, Ni<sub>2</sub>Mo<sub>3</sub>N, Mo<sub>2</sub>N and Mo<sub>2</sub>C, which provided further evidence for the presence of these phases and revealed the structural transformations occurring during the calcination process. These results indicated that the calcination temperature played a crucial role in the phase transition of the catalysts and their OER performance.

XPS experiments were carried out to determine the valence states of elements. The survey spectrum manifested the presence of Co, Mo, O, N and C elements in Co-POMOF (Fig. S19(a)). In the Co 2p spectrum of Co-POMOF (Fig. S20(a)), the peak positions of Co 2p<sub>3/2</sub> and Co 2p<sub>1/2</sub> were centered at 779.1 and 793.8 eV, corresponding to Co–N bonds, indicating that the cobalt atom was successfully coordinated with btap, further verified by the presence of N–Co coordination at 395.7 eV in the N 1s spectrum (Fig. S20(d)) [18]. The peaks at binding energies of 781.0 and 796.8 eV can be attributed to Co<sup>3+</sup>, while the second spin–orbit doublet at binding energies of 782.8 and 798.5 eV can be attributed to Co<sup>2+</sup> [19]. Fig. S20(b) showed the spectrum of Mo 3d, which can be deconvoluted into four peaks corresponding to Mo<sup>4+</sup> (230.9 and 234.0 eV) and Mo<sup>6+</sup> (232.6 and 235.7 eV). Fig. S20(d) showed the spectrum of N 1s, which can be decontaminated into four peaks at 395.7, 398.1, 400.0 and 401.4 eV, belonging to N–Co, pyridinic-N, nitrogen bond from btap ligand and residual NH<sub>4</sub><sup>+</sup>, respectively. The elemental composition and chemical valences of Ni-POMOF were analyzed by XPS, which was composed of Ni, Mo, O, N and C elements (Fig. S19(b)). As

shown in Fig. S21(a), the XPS spectrum of Ni 2p, the peaks at 856.1 and 873.5 eV belonged to Ni<sup>2+</sup>, while the peaks at 857.9 and 875.7 eV were assigned to Ni<sup>3+</sup>. The Mo 3d spectrum revealed the existence of Mo<sup>5+</sup> and Mo<sup>6+</sup> in Ni-POMOF (Fig. S21(c)), where the Mo<sup>5+</sup> and Mo<sup>6+</sup> peaks located at 234.4 and 235.1 eV for Mo 2p<sub>3/2</sub>, and 231.3 and 231.9 eV for Mo 2p<sub>5/2</sub>, respectively. The N 1s peaks of Ni-POMOF (Fig. S21(g)) can also be deconvoluted into four peaks as N–Ni (396.8 eV), pyridinic-N (398.1 eV), nitrogen bond from btap ligand (399.1 eV) and residual NH<sub>4</sub><sup>+</sup> (400.3 eV) [18]. Before OER, Ni 2p XPS spectrum of Ni-POMOF-900 showed peaks at 856.8/858.3 eV of Ni 2p<sub>3/2</sub> and 874.4/876.2 eV of Ni 2p<sub>1/2</sub>, corresponding to Ni<sup>2+</sup> and Ni<sup>3+</sup>, respectively (Fig. S21(b)). After OER, 856.5/857.8 eV of Ni 2p<sub>3/2</sub> and 874.3/874.5 eV of Ni 2p<sub>1/2</sub> were ascribed to Ni(OH)<sub>2</sub> and NiOOH [20]. Before OER, O 1s spectrum of Ni-POMOF-900 showed peaks located at 531.2 and 532.5 eV belonging to the lattice oxygen and adsorbed water molecule (Fig. S21(f)) [21]. After OER, H<sub>2</sub>O and oxide ions (O<sub>2</sub><sup>-</sup>) from NiOOH peaks appeared at 532.3 and 533.5 eV [20, 21], respectively. The binding energies of 227.4/230.1/233.3 eV of Mo 3d<sub>5/2</sub> and 230.4/233.3/236.4 eV of Mo 3d<sub>3/2</sub> were assigned to Mo–N, Mo<sup>4+</sup> and Mo<sup>5+</sup>, which were found mainly in Ni<sub>2</sub>Mo<sub>3</sub>N phase (Fig. S21(d)). Nevertheless, Mo–N peaks completely disappeared after OER. Before OER, the binding energies of 396.1/398.8 eV of N 1s correspond to N–Mo/Ni and pyridinic-N [18]. After OER, N–Mo/Ni peaks completely disappeared.

Table S9: XPS binding energies for the materials

| Sample                 | M <sup>a</sup> 2p <sub>3/2</sub> (eV) <sup>b</sup> | Mo 3d 2p <sub>5/2</sub> (eV) | O 1s (eV)         | N 1s (eV)               |
|------------------------|----------------------------------------------------|------------------------------|-------------------|-------------------------|
| Co-POMOF               | 779.1/781.0/782.8                                  | 230.9/232.6                  | 530.5/531.2/532.8 | 395.7/398.1/400.0/401.4 |
| Co-POMOF after OER     | 780.4/781.2                                        | 231.3/232.4                  | 530.3/531.5/532.9 | 398.0/400.4/403.3       |
| Co-POMOF-700           | 778.3/780.2/781.5                                  | 228.1/229.5/231.9            | 530.0/532.0       | 396.9/394.1/398.1       |
| Co-POMOF-700 after OER | 780.5/782.8                                        | 230.5/232.3                  | 529.9/531.3/532.0 | 398.5/400.4/403.9       |
| Ni-POMOF               | 856.1/857.9                                        | 231.3/231.9                  | 529.1/530.0/531.6 | 396.8/398.1/399.1/400.3 |
| Ni-POMOF after OER     | 854.4/855.6                                        | 229.2/232.5                  | 531.3/531.8       | 395.7/399.4/400.6       |
| Ni-POMOF-900           | 856.8/858.3                                        | 227.4/230.1/233.3            | 531.2/532.5       | 396.1/398.8             |
| Ni-POMOF-900 after OER | 856.5/857.8                                        | 232.9/233.9                  | 532.3/533.5       | 398.2/401.1             |

<sup>a</sup> M = Co or Ni.

<sup>b</sup> All peaks were referenced to C 1s at 284.8 eV.



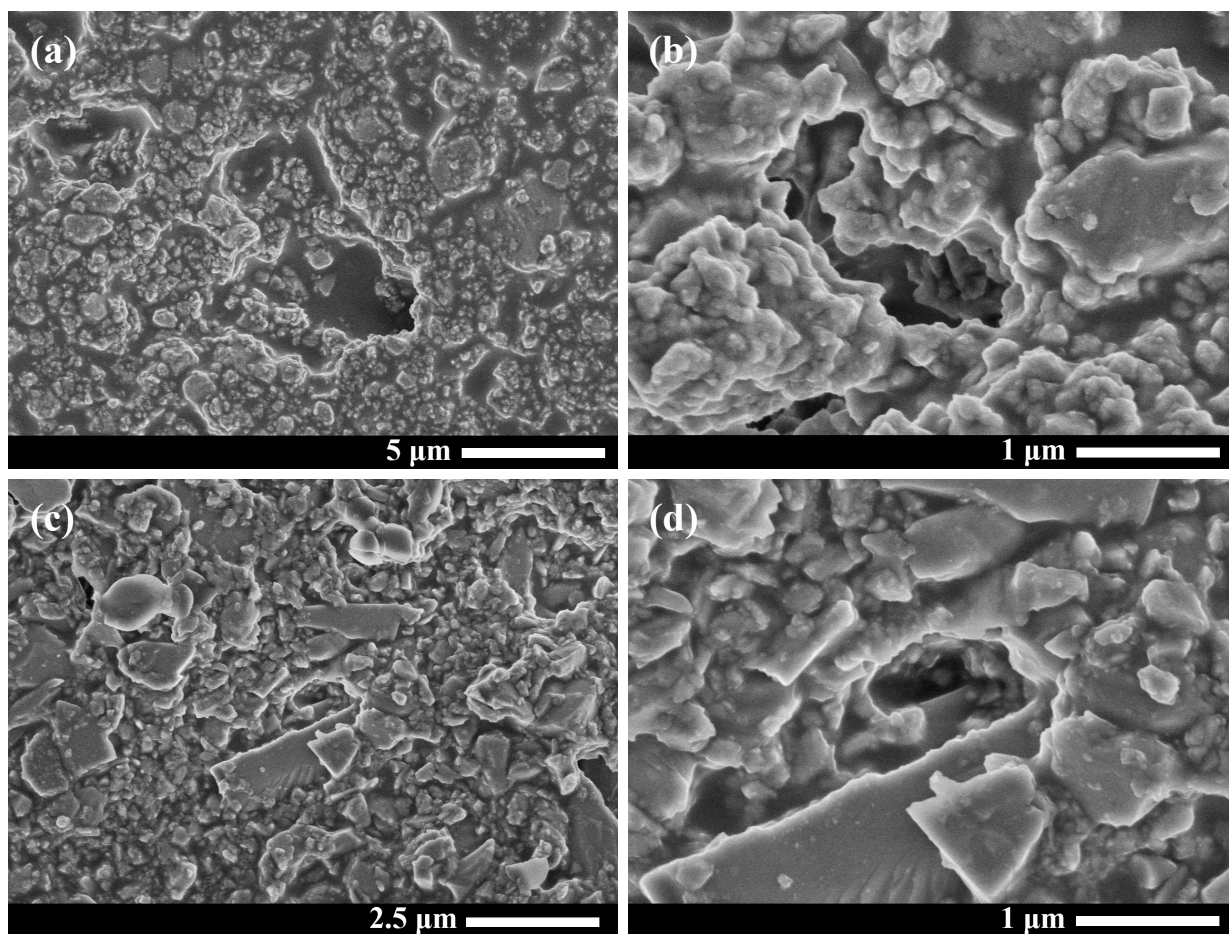

Figure S16: SEM images of (a)(b) Co-POMOF and (c)(d) Ni-POMOF.

Table S10: Atomic ratios of surface species determined by the XPS survey spectra and the relative ratios

| Sample                 | O (at.%) | N (at.%) | Mo (at.%) | M <sup>a</sup> (at.%) | N/M <sup>a</sup> | Mo/M <sup>a</sup> |
|------------------------|----------|----------|-----------|-----------------------|------------------|-------------------|
| Co-POMOF               | 30.81    | 32.02    | 16.16     | 6.13                  | 5.22             | 2.64              |
| Co-POMOF after OER     | 8.16     | 2.27     | 0.61      | 3.74                  | 0.61             | 0.16              |
| Co-POMOF-700           | 19.84    | 28.11    | 21.16     | 6.37                  | 4.41             | 3.32              |
| Co-POMOF-700 after OER | 13.52    | 0.78     | 0.29      | 1.75                  | 0.45             | 0.17              |
| Ni-POMOF               | 17.89    | 39.79    | 13.67     | 3.12                  | 12.75            | 4.38              |
| Ni-POMOF after OER     | 10.02    | 0.75     | 0.12      | 2.63                  | 0.29             | 0.05              |
| Ni-POMOF-900           | 19.40    | 27.83    | 28.27     | 6.03                  | 4.62             | 4.69              |
| Ni-POMOF-900 after OER | 16.76    | 0.50     | 0.13      | 4.19                  | 0.20             | 0.03              |

<sup>a</sup> M = Co or Ni.

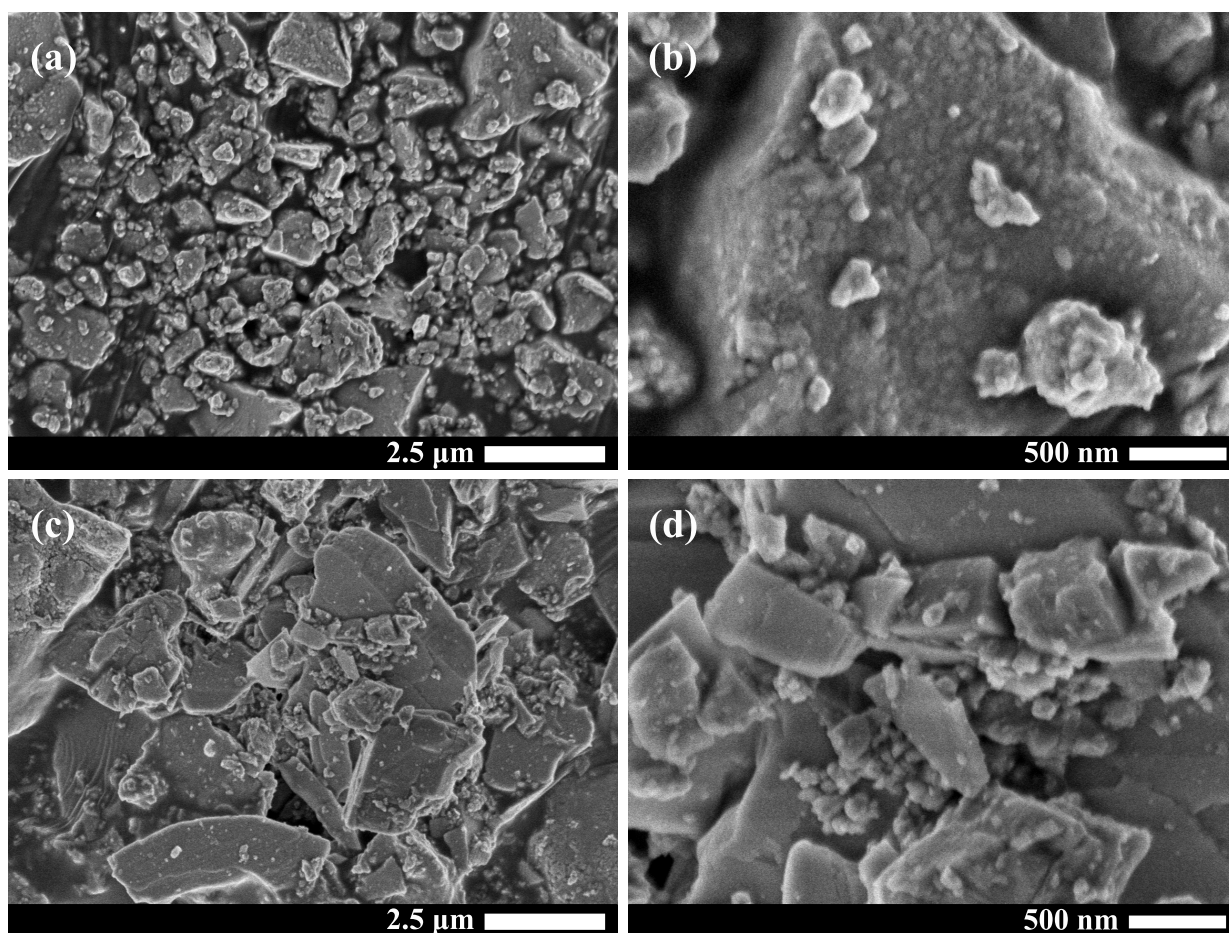

Figure S17: SEM images of (a)(b) Co-POMOF-700 and (c)(d) Ni-POMOF-900.

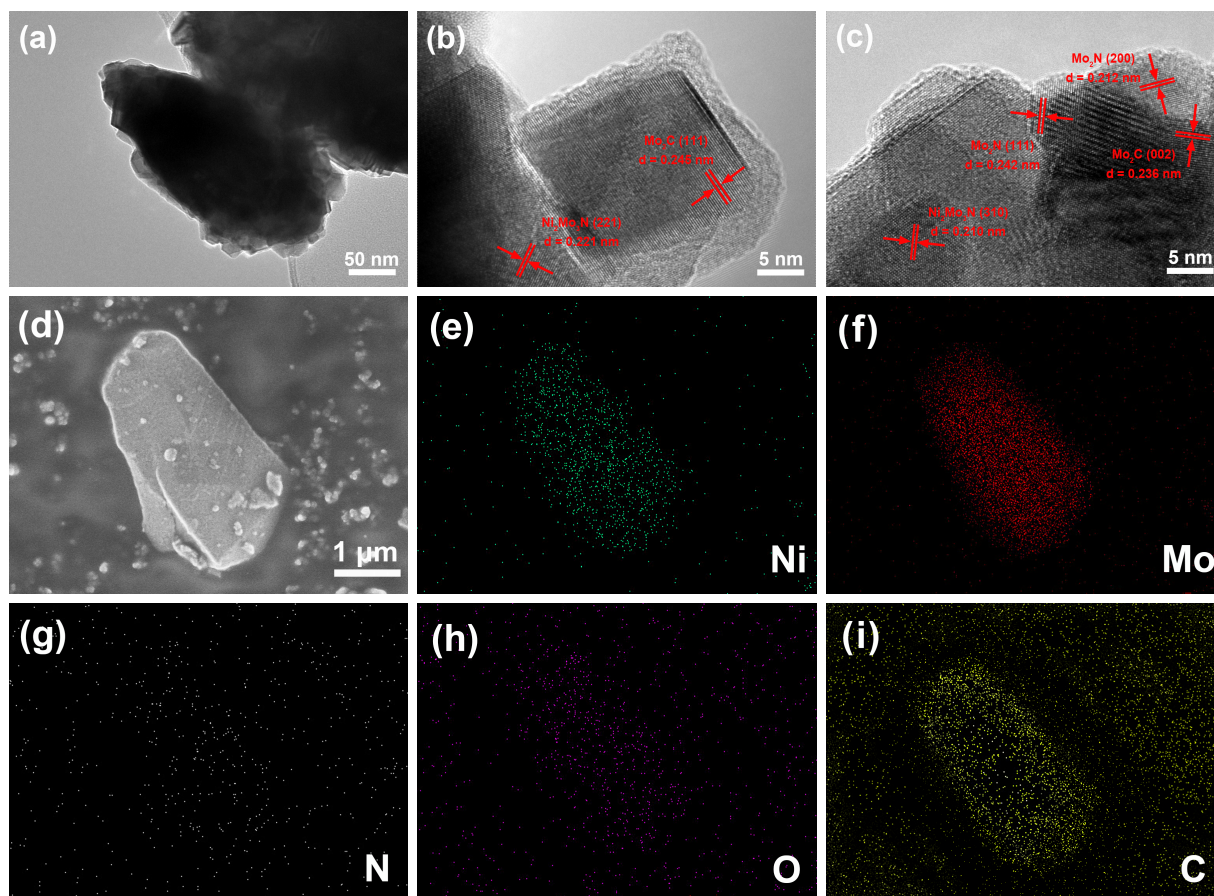

Figure S18: (a) TEM and (b,c) HR-TEM images of Ni-POMOF-900. (d – i) EDX mapping images of Ni-POMOF-900.

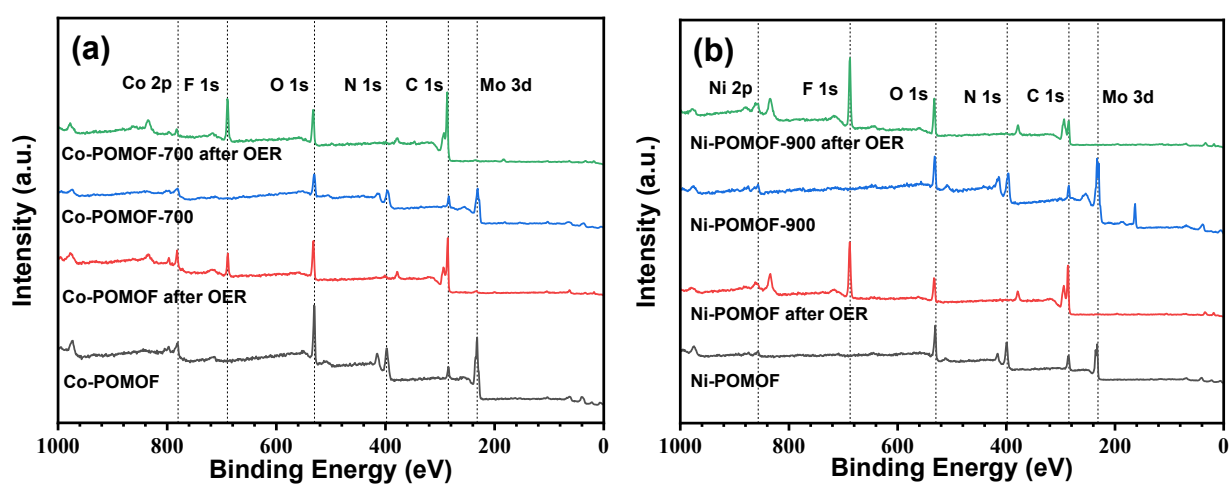

Figure S19: (a) XPS spectra of Co-POMOF before and after OER, and Co-POMOF-700 before and after OER. (b) XPS spectra of Ni-POMOF before and after OER, and Ni-POMOF-900 before and after OER.

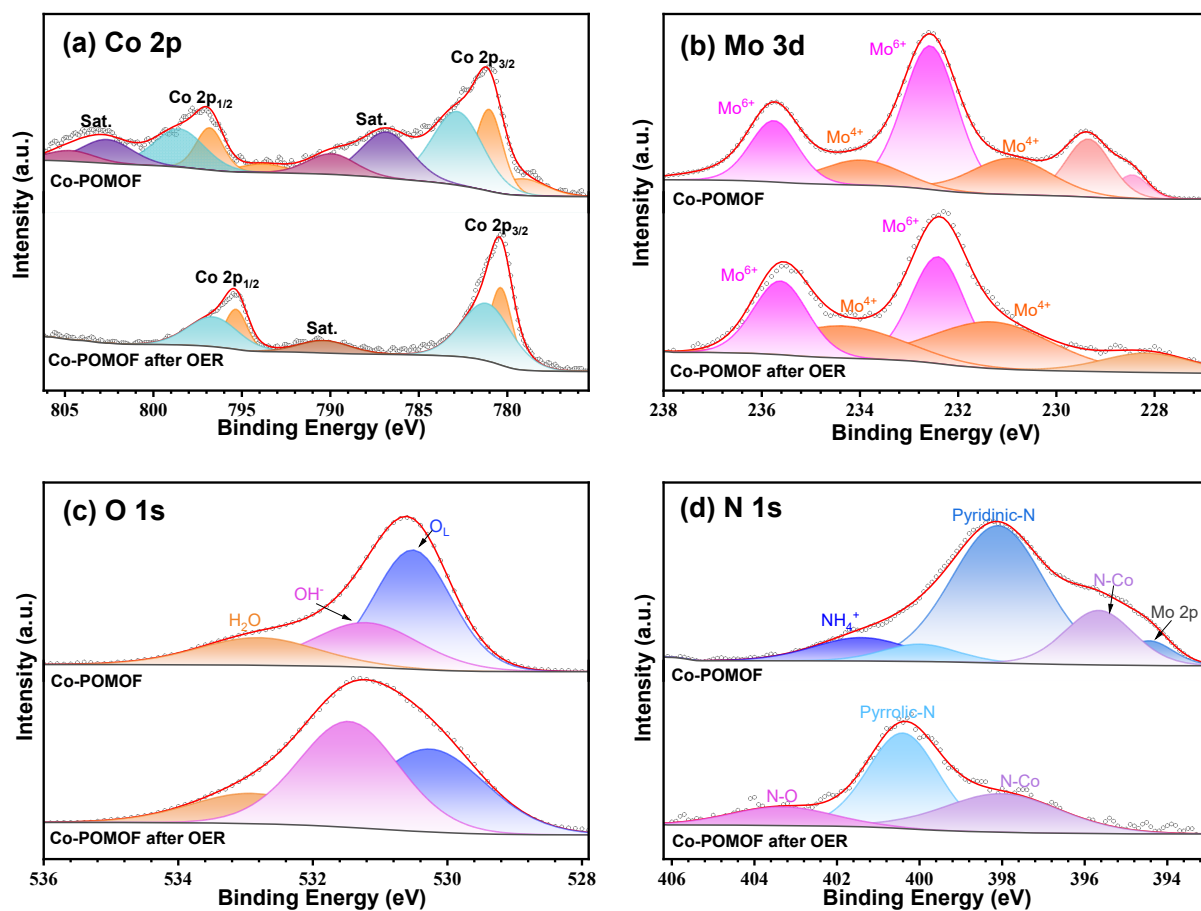

Figure S20: (a) Co 2p XPS spectra of Co-POMOF before and after OER. (b) Mo 3d XPS spectra of Co-POMOF before and after OER. (c) O 1s XPS spectra of Co-POMOF before and after OER. (d) N 1s XPS spectra of Co-POMOF before and after OER.

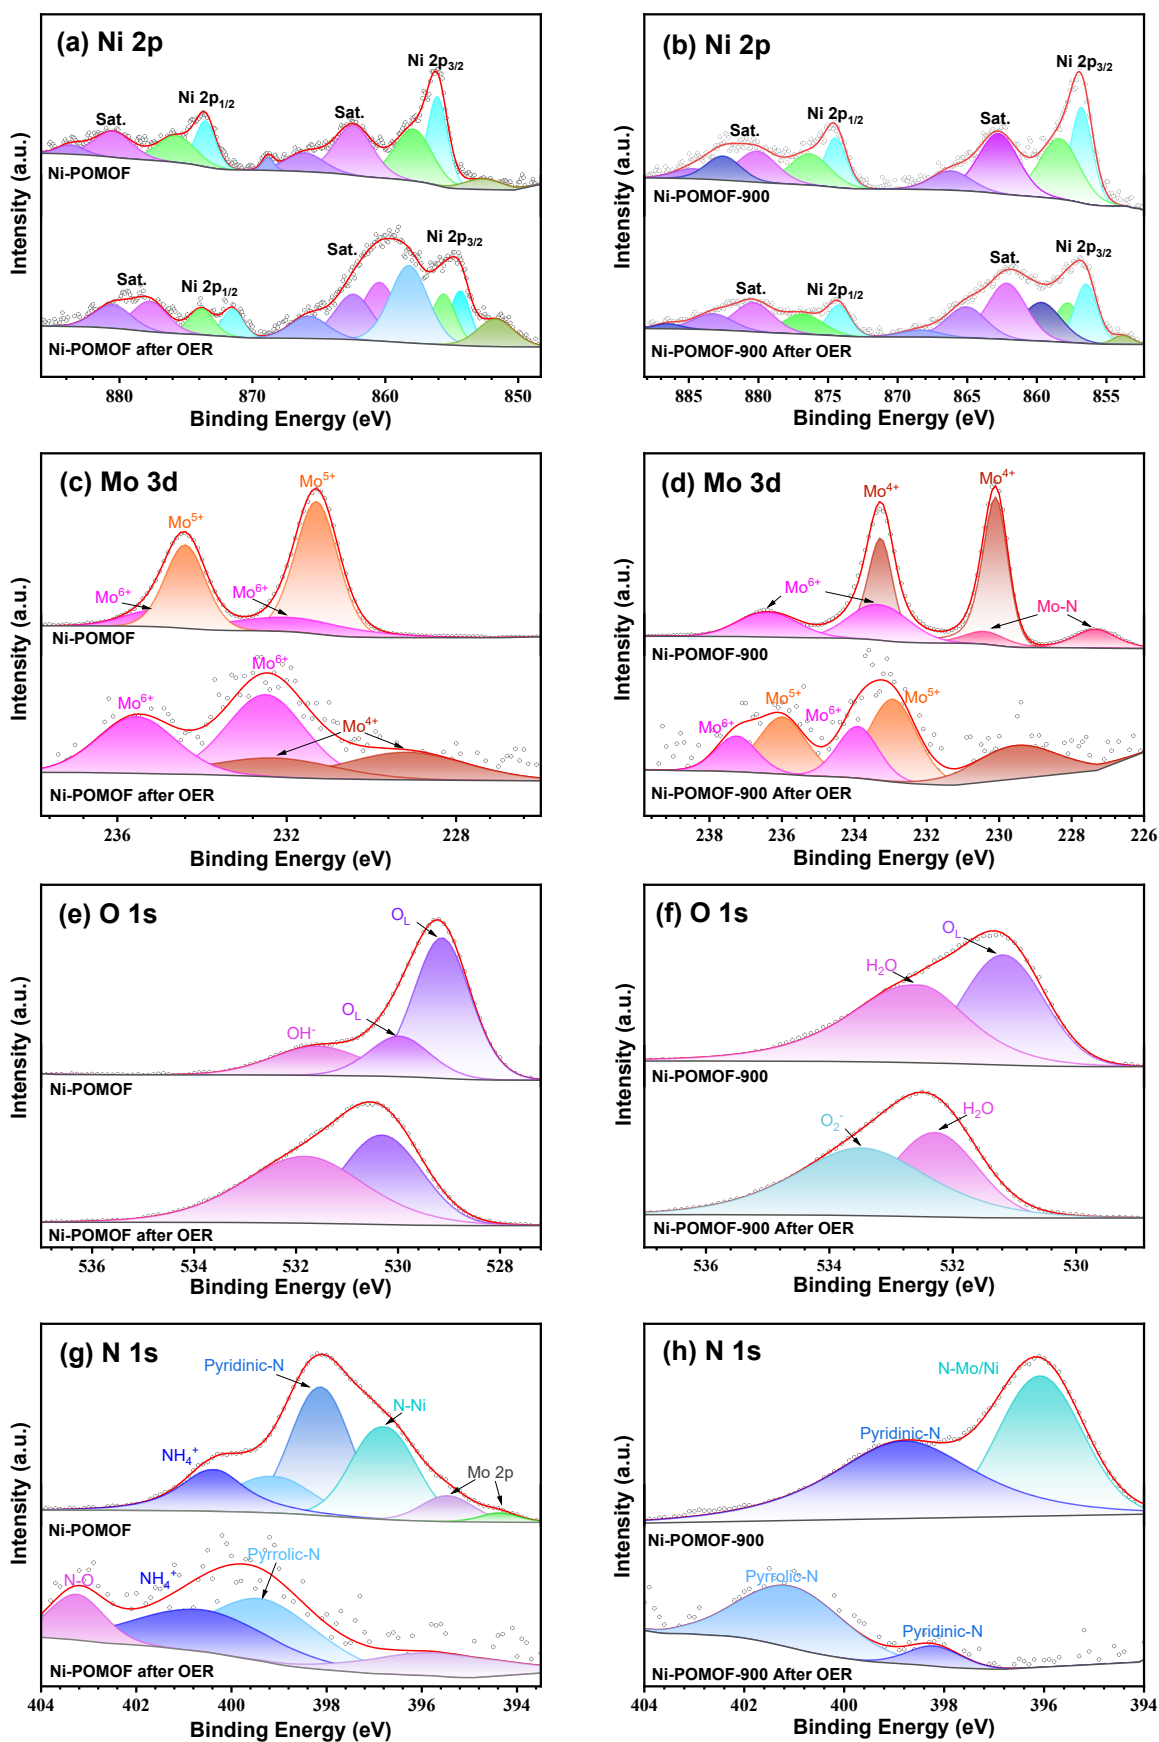

Figure S21: Ni 2p XPS spectra of (a) Ni-POMOF, and (b) Ni-POMOF-900 before and after OER. Mo 3d XPS spectra of (c) Ni-POMOF, and (d) Ni-POMOF-900 before and after OER. O 1s XPS spectra of (e) Ni-POMOF, and (f) Ni-POMOF-900 before and after OER. N 1s XPS spectra of (g) Ni-POMOF, and (h) Ni-POMOF-900 before and after OER.

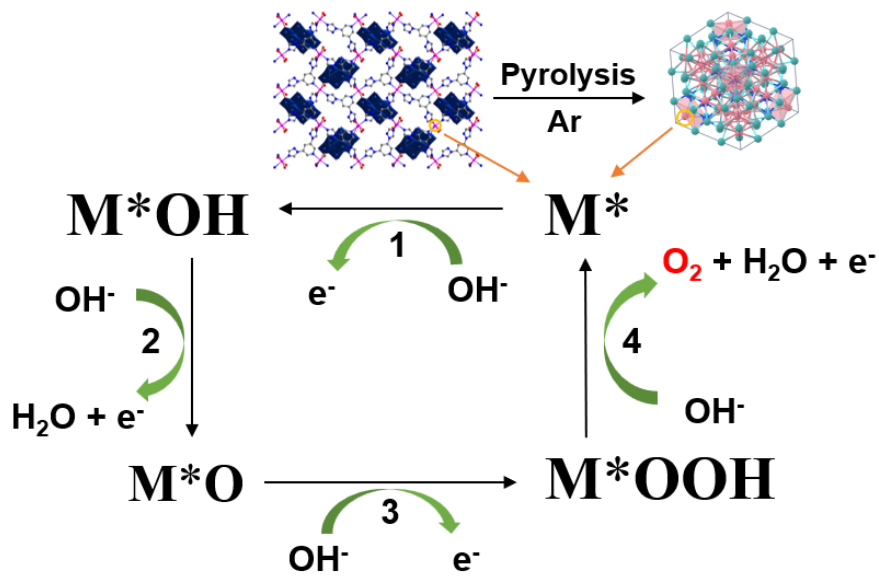

Figure S22: OER pathway.

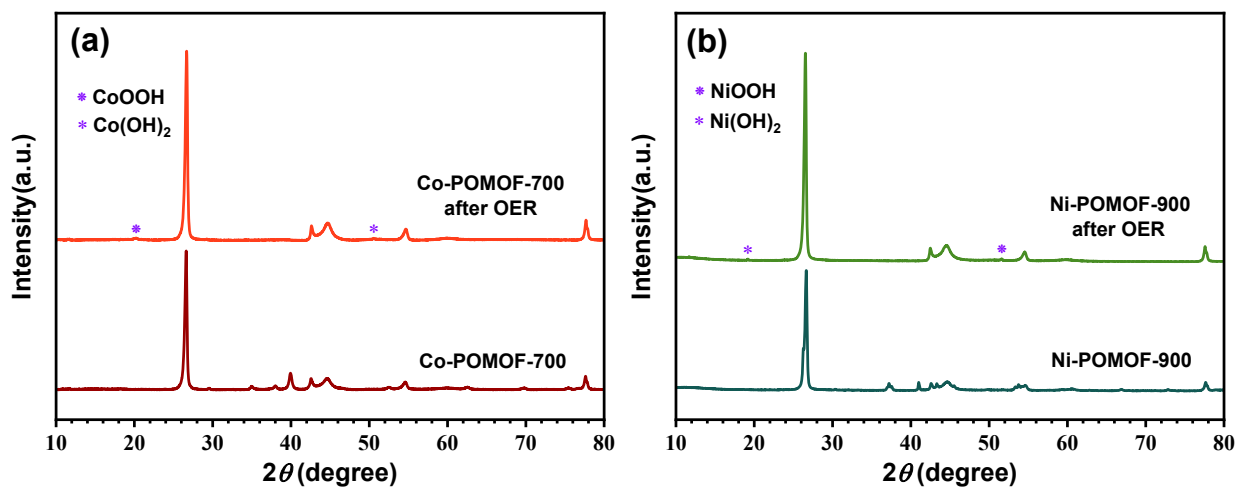

Figure S23: (a) PXRD patterns of Co-POMOF-700/GE before and after OER. (b) PXRD patterns of Ni-POMOF-900/GE before and after OER.

## 6. Electrochemical Properties of Co/Ni-POMOF and Co/Ni-POMOF-T

### 6.1. Preparation of Working Electrodes

Modified graphite electrodes (GE) were used as working electrodes [22]. The working electrodes were prepared according to the following process. After being polished with 0.3 and 0.05  $\mu\text{m}$   $\text{Al}_2\text{O}_3$  particles, the graphite substrate electrode (1 cm  $\times$  1 cm  $\times$  0.5 cm) was cleaned with ultrapure  $\text{H}_2\text{O}$ . POMOF or its thermal derivatives were mixed with polyvinylidene fluoride (PVDF) and carbon black by adequate grinding in an appropriate mass ratio at 1 ml of *N*-methyl-2-pyrrolidone (NMP) and ink suspension was obtained. The obtained slurry was homogenized by ultrasonication, and 100  $\mu\text{L}$  of the slurry was dropped onto the graphite electrode to form a thin film, and then dried under an infrared lamp. The other surfaces of the graphite electrode were covered with a thin polytetrafluoroethylene (PTFE) film and the electrode surface area,  $A = 1 \text{ cm} \times 1 \text{ cm}$ . All of the working electrodes were kept in a desiccator prior to electrochemical measurements.

### 6.2. Electrochemical Measurements

All electrochemical measurements were performed in an aqueous solution of 1 M KOH (pH  $\approx$  14) at room temperature. The three-electrode system was connected to an electrochemical workstation (CHI 660E, CH Instruments), where the reference electrode was a saturated calomel electrode (SCE,  $\text{Hg}/\text{Hg}_2\text{Cl}_2$ ) and the counter electrode was a platinum wire. Linear sweep voltammetry (LSV) was measured at a scan rate of 5  $\text{mV s}^{-1}$  with 85 % *iR* compensation [23]. Working potentials were converted with respect to the reversible hydrogen electrode (RHE) according to the following equation:

$$E_{\text{RHE}} = E_{\text{SCE}} + 0.059 \times \text{pH} + 0.2415 \text{ (V)} \quad (1)$$

For the LSV curve of oxygen eVolution reaction (OER), the overpotential ( $\eta$ ) of each electrode material was calculated according to the following equation [24]:

$$\eta = E_{\text{RHE}} - 1.23 \text{ (V)} \quad (2)$$

The Tafel slope was calculated according to the following equation [25–28]:

$$\eta = b \log |j| + a \quad (3)$$

with  $\eta$  the overpotential in mV,  $b$  the Tafel slope in  $\text{mV dec}^{-1}$ ,  $j$  the current density in  $\text{mA cm}^{-2}$ , and  $a$  the exchange current density.

Double layer capacitance ( $C_{\text{dl}}$ ) was calculated in the non-Faradaic potential region by cyclic voltammetry (CV) curves at different scanning rates [29].

The electrochemical impedance spectroscopy (EIS) was performed in the frequency region of  $10^5$  to  $10^{-2}$  Hz with an amplitude of 5 mV. Electrocatalytic stability was assessed by polarization curves (LSV) measured with the 1000 or 2000 CV cycle in 1 M KOH solution, and  $i - t$  curves were obtained by chronoamperometry at constant operating voltage for 12 or 24 hours.

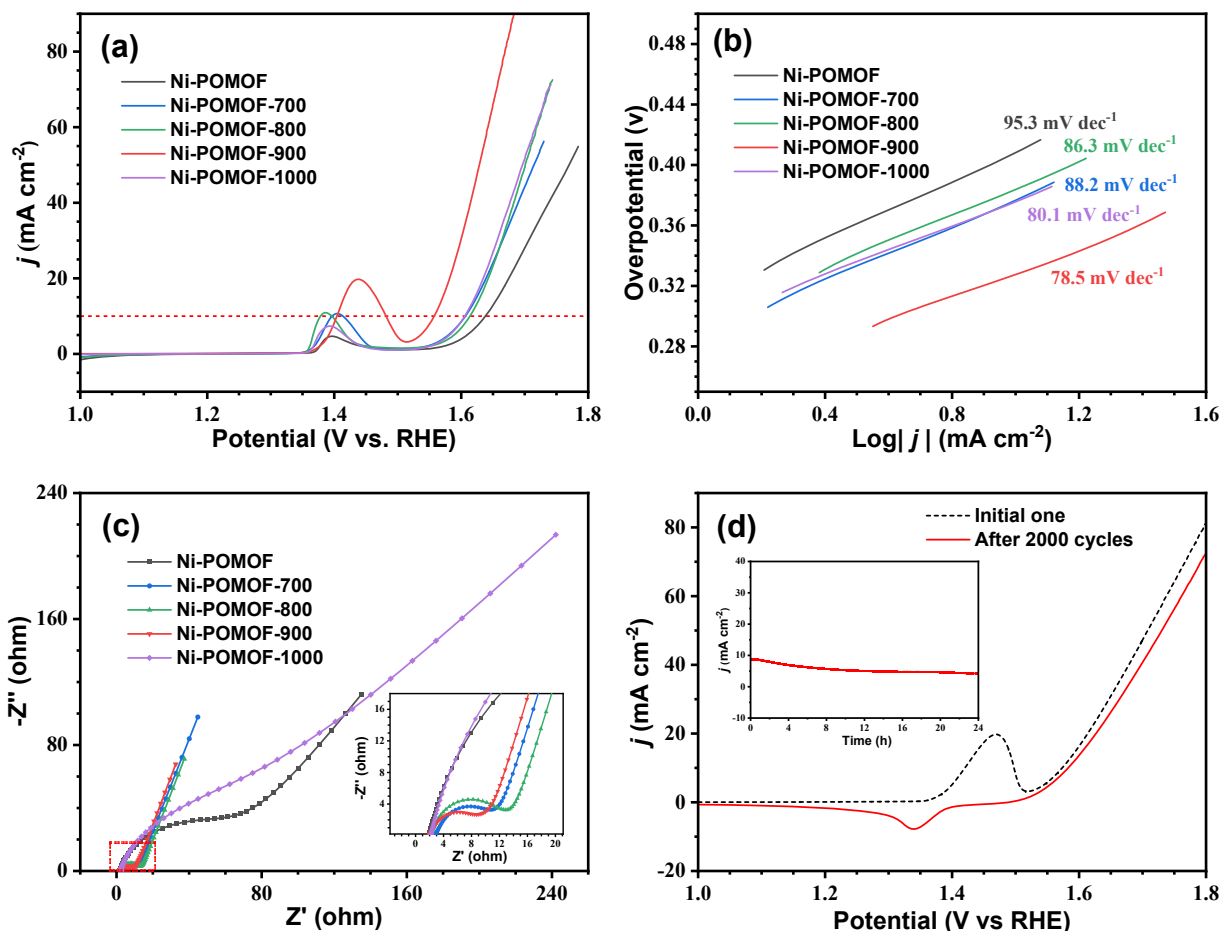

Figure S24: (a) LSV curves with the potential range of 1.0 to 1.8 V (*vs.* RHE) in 1 M KOH for OER. (b) Tafel plots from the LSV curves. (c) EIS curves. (d) LSV curves of Ni-POMOF-900 before and after 2000 CV cycles (inset: chronoamperometric measurement at 10 mA cm<sup>-2</sup> for Ni-POMOF-900 in 24 h).

By fitting  $\Delta j$  ( $\Delta j = |j_{pa} - j_{pc}|$ ) to the scanning rate, the  $C_{dl}$  value of Co-POMOF-700 (6.2 mF cm<sup>-2</sup>) was calculated to be slightly higher than that of Co-POMOF (4.2 mF cm<sup>-2</sup>) (Fig. S25(a,b)), and the  $C_{dl}$  value of Ni-POMOF-900 (5.9 mF cm<sup>-2</sup>) was also slightly higher than that of Ni-POMOF (2.0 mF cm<sup>-2</sup>) (Fig. S25(c,d)). The improved OER performance of Co-POMOF-700 and Ni-POMOF-900 can be attributed in part to their better intrinsic activity, with Co-POMOF-700 and Ni-POMOF-900 having a greater specific surface area, which can expose more active sites.

The electrocatalytic activities of Co-POMOF-T with a mass loading of 1.0 mg cm<sup>-2</sup> in 1 M KOH toward OER were studied. As widely accepted, the Co<sup>2+</sup> species in Co-based electrocatalysts generally experienced obvious oxidation processes and transformed into high-oxidation cobalt species, which was critical to their electrocatalytic performances. This CV process can be viewed as a precatalytic treatment of Co<sup>2+</sup> → Co<sup>3+</sup> → Co<sup>4+</sup> activation in alkaline medium, and indicated that the active sites of OER mainly resulted from surface redox reactions.



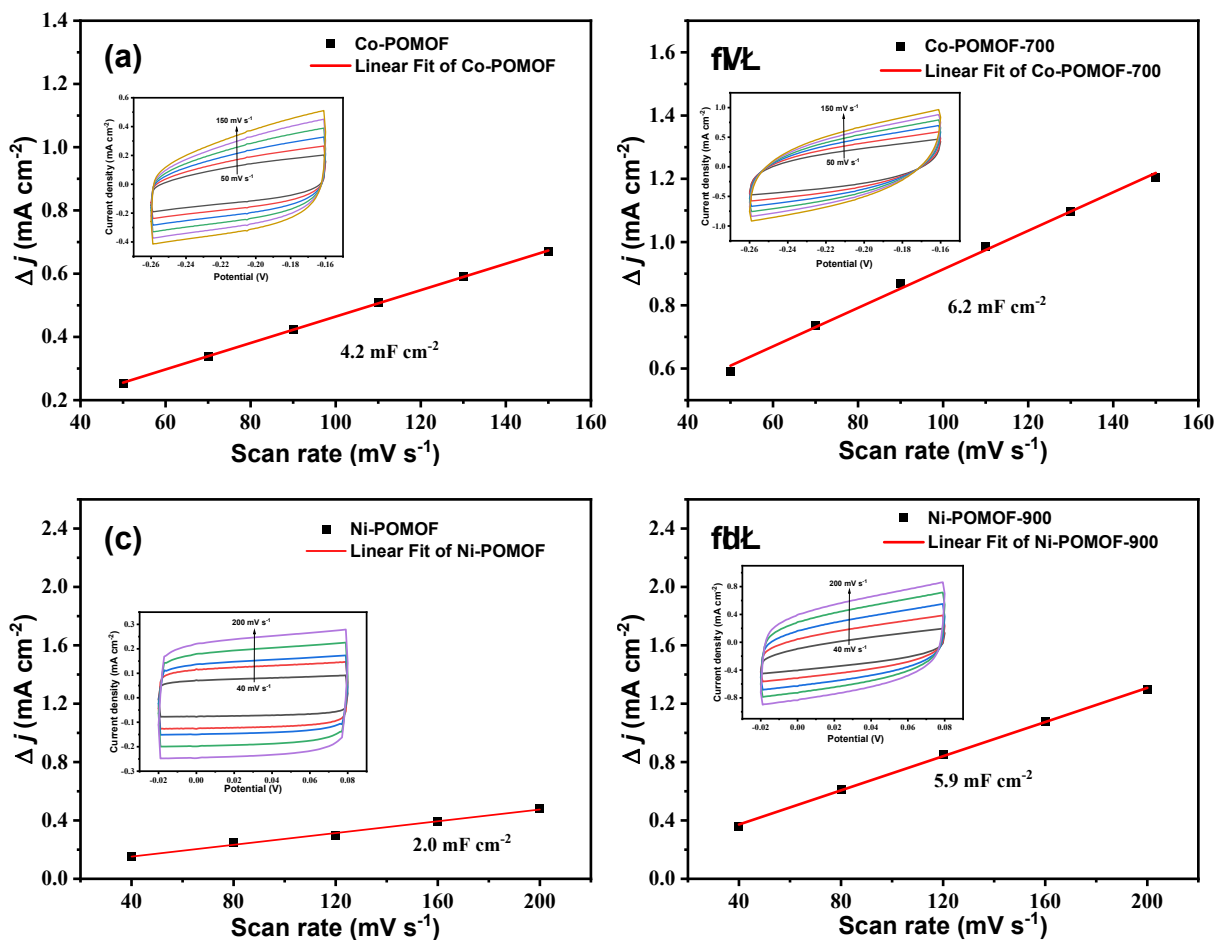

Figure S25: Double-layer capacitance ( $C_{dl}$ ) from the CV curves (Insert: CV curves) for (a) Co-POMOF, (b) Co-POMOF-700, (c) Ni-POMOF and (d) Ni-POMOF-900.

Fig. S26(a,c,e,g,i) showed the CV plots of various electrodes at a scan rate from 10 to 190 mV s<sup>-1</sup> with a step of 20 mV s<sup>-1</sup>. A pair of redox peaks appeared at around 1.0 V and 1.4 V *vs.* RHE can be clearly seen in every scan cycle of these curves, which might originate from the change between Co ions of different valence states ( $\text{Co}^{2+} \rightarrow \text{Co}^{3+}$ ) similar to the previous reports of many Co-based materials [30]. Different from the Ni materials with only a pair of redox peaks, another pair of redox peaks of  $\text{Co}^{3+} \rightarrow \text{Co}^{4+}$  appeared at about 1.3 V and 1.6 V *vs.* RHE. The results of the anodic peak potential ( $E_{pa}$ ), the cathodic peak potential ( $E_{pc}$ ), the half-wave potential ( $E_{1/2} = (E_{pa} + E_{pc})/2$ ), and the potential peak separation ( $\Delta E_p = |E_{pa} - E_{pc}|$ ) for the pair of waves were reported in Table S11. When the scan rate increased from 10 to 190 mV s<sup>-1</sup>,  $\Delta E_p$  increased slightly. The cathodic peak current densities ( $j_{pc}$ ) and the anode peak current densities ( $j_{pa}$ ) of the  $\text{Co}^{2+} \rightarrow \text{Co}^{3+}$  redox peaks were linear with the scan rates, as shown in Fig. S26(b,d,f,h,j), indicating that the process belonged to the surface controlled electrode process. For an ideal electrode, the peak potential does not change with scan rate [31]. In fact, the reversibility of an electrode reaction is related to the scanning rate. At low scan rates, the electrode reaction

shows reversible characteristics. While at high scan rates, the charge transfer reaction rate and mass transfer process no longer follow the Nernst equation, and the electrode reaction changes from reversible to irreversible [32]. The absolute values of  $j_{pc}$  and  $j_{pa}$  were roughly equal at the low sweep rates, which meant that the ratio of the absolute value of  $j_{pc}$  and  $j_{pa}$  was close to 1. The value of  $\Delta E_p$  approached  $59/n$  mV, but  $E_{1/2}$  and  $\Delta E_p$  increased with increasing scan rate [32]. The electrode reaction was quasi-reversible [33].  $E_{1/2}$  and  $\Delta E_p$  data for the  $\text{Co}^{2+} \rightarrow \text{Co}^{3+}$  redox peaks were tabulated in Table S11.

Ni-POMOF-T was also configured as anode materials (mass loading  $1.0 \text{ mg cm}^{-2}$ ) in 1 M KOH for OER performance. Usually, a couple of redox peaks can be observed in those typical cyclic voltammetry (CV) curves of Ni-based materials, and the pair of sharp peaks belonged to the redox electric pair peaks  $\text{Ni}^{2+} \rightarrow \text{Ni}^{3+}$  [34]. Fig. S27(a,c,e,g,i) displayed the CV curves of the four Ni-POMOF-T at different scan rates. The results of  $E_{pa}$ ,  $E_{pc}$ ,  $E_{1/2}$  and  $\Delta E_p$  were reported in Table S12. It can be seen that  $j_{pc}$  and  $j_{pa}$  depended linearly on the square roots of the sweep rates (Fig. S27(b,d,f,h,j)), indicating that the diffusion of the electrolyte was dominant in the redox process for the Ni-POMOF-T.

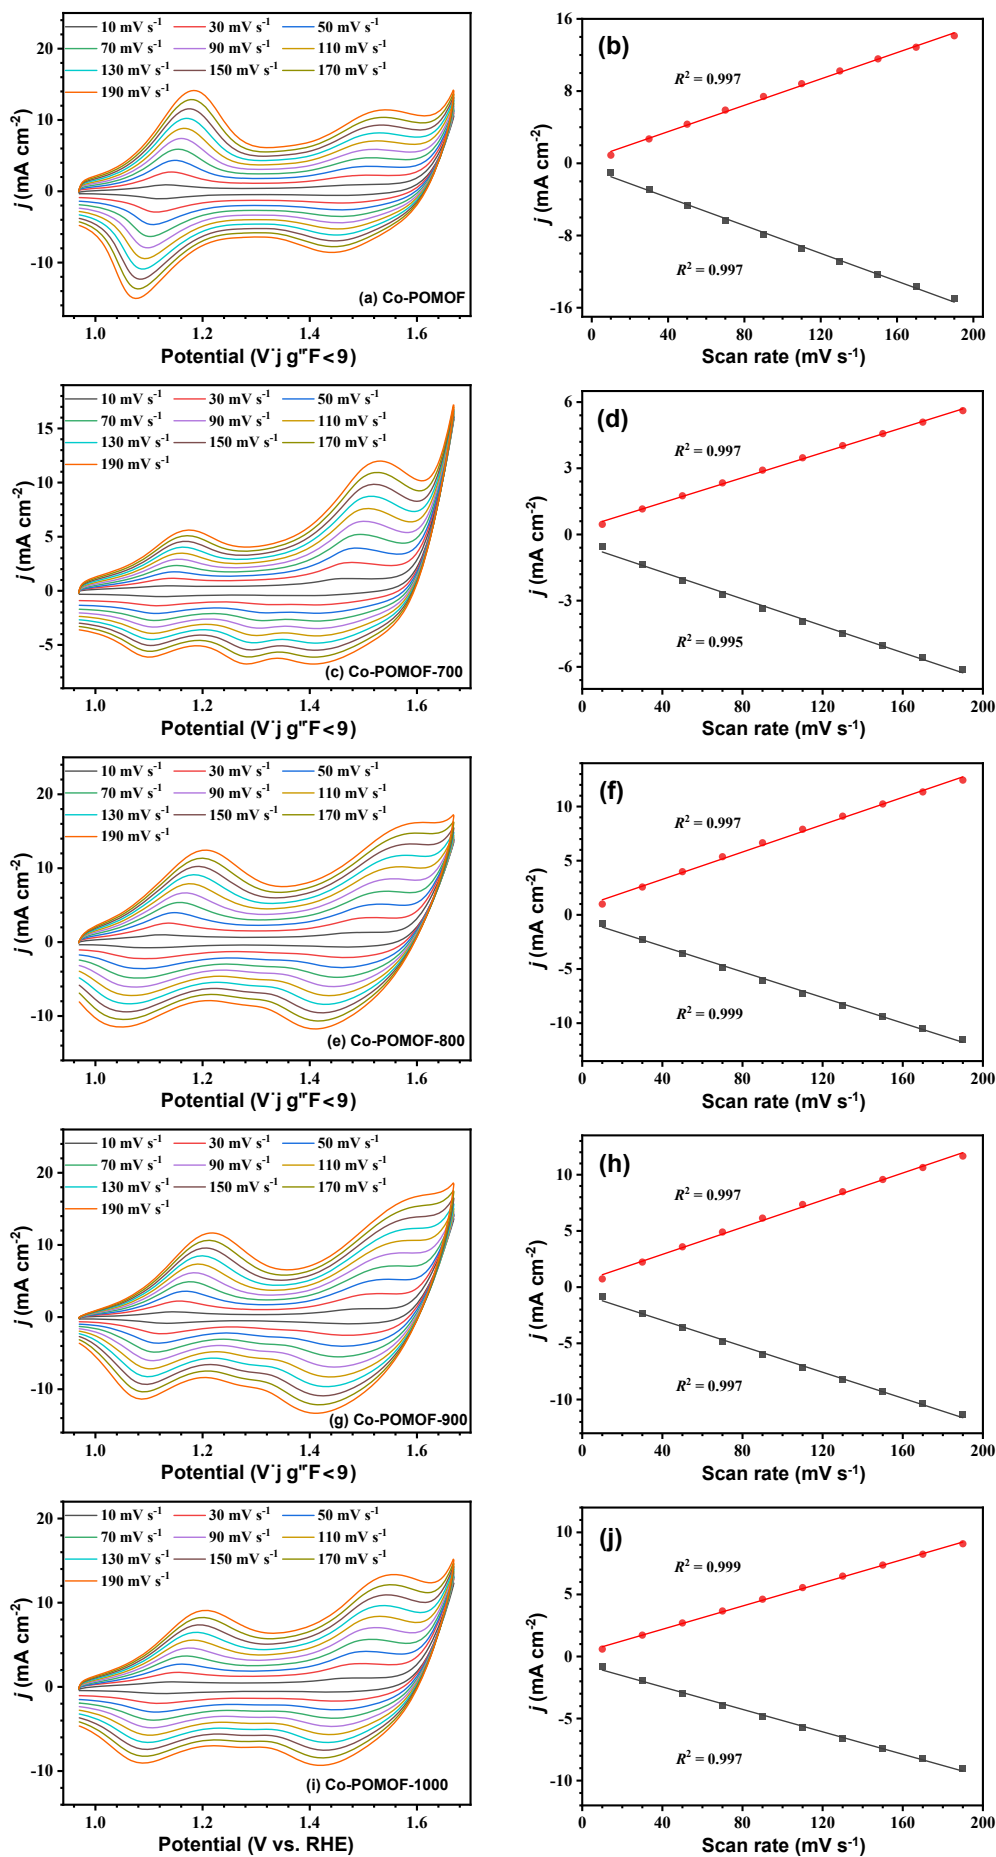

Figure S26: CV curves of (a) Co-POMOF, (c) Co-POMOF-700, (e) Co-POMOF-800, (g) Co-POMOF-900 and (i) Co-POMOF-1000 at different scan rates (10, 30, 50, 70, 90, 110, 130, 150, 170 and 190  $\text{mV s}^{-1}$  with 0.97 to 1.67 V (*vs.* RHE)). The linear relationship between the anode (red) and cathode (black) CV current densities with different scan rates of (b) Co-POMOF, (d) Co-POMOF-700, (f) Co-POMOF-800, (h) Co-POMOF-900 and (j) Co-POMOF-1000.

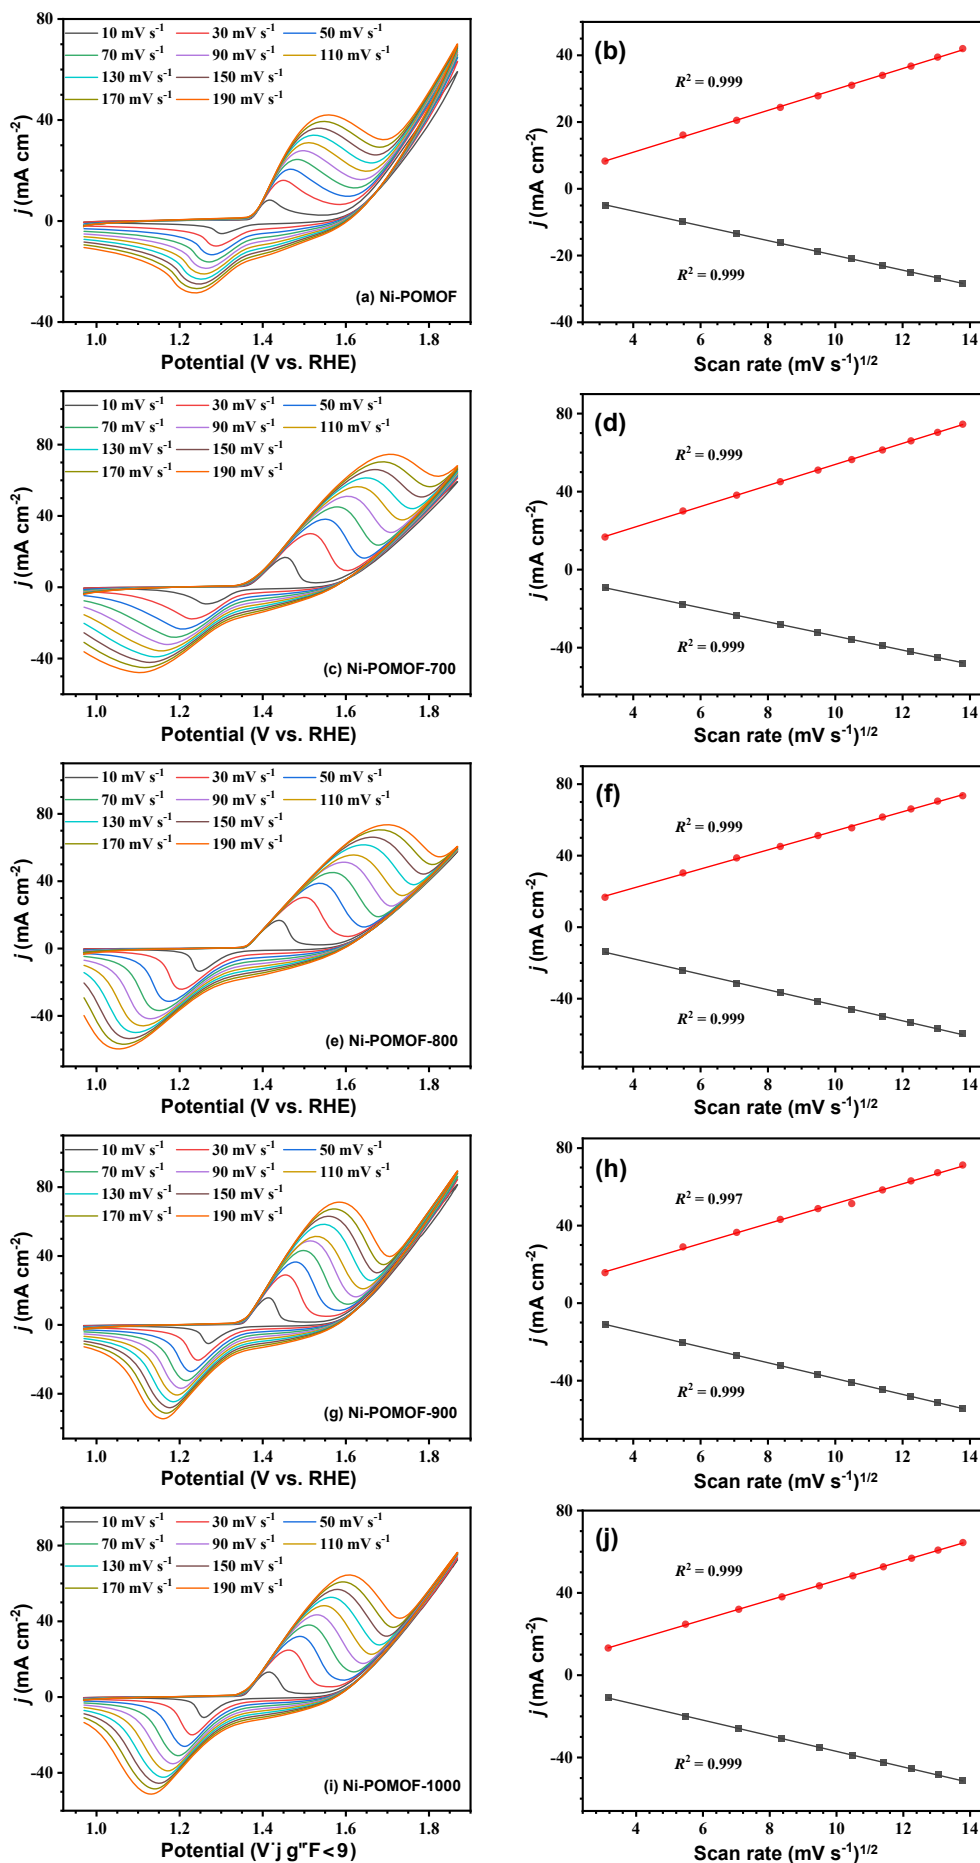

Figure S27: CV curves of (a) Ni-POMOF, (c) Ni-POMOF-700, (e) Ni-POMOF-800, (g) Ni-POMOF-900 and (i) Ni-POMOF-1000 at different scan rates (10, 30, 50, 70, 90, 110, 130, 150, 170 and 190  $\text{mV s}^{-1}$  with 0.97 to 1.87 V (*vs.* RHE). The linear relationship between the anode (red) and cathode (black) CV current densities with different half of the square of the scan rates of (b) Ni-POMOF, (d) Ni-POMOF-700, (f) Ni-POMOF-800, (h) Ni-POMOF-900 and (j) Ni-POMOF-1000.

Table S11:  $E_{1/2}$  and  $\Delta E_p$  data of the Co-POMOFs materials

| Sample       | Scan rate             | $E_{pc}$ | $E_{pa}$ | $E_{1/2}$ | $\Delta E_p$ |
|--------------|-----------------------|----------|----------|-----------|--------------|
|              | (mV s <sup>-1</sup> ) | (V)      | (V)      | (V)       | (mV)         |
| Co-POMOF     | 10                    | 1.1199   | 1.1339   | 1.1269    | 14           |
|              | 30                    | 1.1129   | 1.1399   | 1.1264    | 27           |
|              | 50                    | 1.1069   | 1.1489   | 1.1279    | 42           |
|              | 70                    | 1.1019   | 1.1529   | 1.1274    | 51           |
|              | 90                    | 1.0969   | 1.1609   | 1.1289    | 64           |
|              | 110                   | 1.0929   | 1.1659   | 1.1294    | 73           |
|              | 130                   | 1.0869   | 1.1719   | 1.1294    | 85           |
|              | 150                   | 1.0829   | 1.1739   | 1.1284    | 91           |
|              | 170                   | 1.0779   | 1.1779   | 1.1279    | 100          |
|              | 190                   | 1.0749   | 1.1829   | 1.1289    | 108          |
| Co-POMOF-700 | 10                    | 1.1209   | 1.1369   | 1.1289    | 16           |
|              | 30                    | 1.1159   | 1.1449   | 1.1304    | 29           |
|              | 50                    | 1.1139   | 1.1479   | 1.1309    | 34           |
|              | 70                    | 1.1099   | 1.1529   | 1.1314    | 43           |
|              | 90                    | 1.1079   | 1.1559   | 1.1319    | 48           |
|              | 110                   | 1.1049   | 1.1589   | 1.1319    | 54           |
|              | 130                   | 1.1059   | 1.1639   | 1.1349    | 58           |
|              | 150                   | 1.1029   | 1.1689   | 1.1359    | 66           |
|              | 170                   | 1.1009   | 1.1719   | 1.1364    | 71           |
|              | 190                   | 1.0999   | 1.1749   | 1.1374    | 75           |
| Co-POMOF-800 | 10                    | 1.0889   | 1.1229   | 1.1059    | 34           |
|              | 30                    | 1.0919   | 1.1369   | 1.1144    | 45           |
|              | 50                    | 1.0869   | 1.1479   | 1.1174    | 61           |
|              | 70                    | 1.0799   | 1.1589   | 1.1194    | 79           |
|              | 90                    | 1.0689   | 1.1669   | 1.1179    | 98           |
|              | 110                   | 1.0689   | 1.1769   | 1.1229    | 108          |
|              | 130                   | 1.0619   | 1.1849   | 1.1234    | 123          |
|              | 150                   | 1.0589   | 1.1899   | 1.1244    | 131          |
|              | 170                   | 1.0489   | 1.1969   | 1.1229    | 148          |
|              | 190                   | 1.0429   | 1.2029   | 1.1229    | 160          |
| Co-POMOF-900 | 10                    | 1.0889   | 1.1229   | 1.1059    | 34           |
|              | 30                    | 1.0919   | 1.1369   | 1.1144    | 45           |
|              | 50                    | 1.0869   | 1.1479   | 1.1174    | 61           |
|              | 70                    | 1.0799   | 1.1589   | 1.1194    | 79           |
|              | 90                    | 1.0689   | 1.1669   | 1.1179    | 98           |
|              | 110                   | 1.0689   | 1.1769   | 1.1229    | 108          |
|              | 130                   | 1.0619   | 1.1849   | 1.1234    | 123          |
|              | 150                   | 1.0589   | 1.1899   | 1.1244    | 131          |

Continued on next page

Table S11 – continued from previous page

| Sample        | Scan rate             | $E_{pc}$ | $E_{pa}$ | $E_{1/2}$ | $\Delta E_p$ |
|---------------|-----------------------|----------|----------|-----------|--------------|
|               | (mV s <sup>-1</sup> ) | (V)      | (V)      | (V)       | (mV)         |
|               | 170                   | 1.0489   | 1.1969   | 1.1229    | 148          |
|               | 190                   | 1.0429   | 1.2029   | 1.1229    | 160          |
| Co-POMOF-1000 | 10                    | 1.1199   | 1.1449   | 1.1324    | 25           |
|               | 30                    | 1.1189   | 1.1529   | 1.1359    | 34           |
|               | 50                    | 1.1129   | 1.1609   | 1.1369    | 48           |
|               | 70                    | 1.1089   | 1.1689   | 1.1389    | 60           |
|               | 90                    | 1.1059   | 1.1749   | 1.1404    | 69           |
|               | 110                   | 1.0999   | 1.1819   | 1.1409    | 82           |
|               | 130                   | 1.0969   | 1.1879   | 1.1424    | 91           |
|               | 150                   | 1.0939   | 1.1929   | 1.1434    | 99           |
|               | 170                   | 1.0929   | 1.1989   | 1.1459    | 106          |
|               | 190                   | 1.0899   | 1.2039   | 1.1469    | 114          |

Table S12:  $E_{1/2}$  and  $\Delta E_p$  data of the Ni-POMOFs materials

| Sample       | Scan rate              | $E_{pc}$ | $E_{pa}$ | $E_{1/2}$ | $\Delta E_p$ |
|--------------|------------------------|----------|----------|-----------|--------------|
|              | ( $\text{mV s}^{-1}$ ) | (V)      | (V)      | (V)       | (mV)         |
| Ni-POMOF     | 10                     | 1.3019   | 1.4169   | 1.3594    | 115          |
|              | 30                     | 1.2879   | 1.4499   | 1.3689    | 162          |
|              | 50                     | 1.2779   | 1.4669   | 1.3724    | 189          |
|              | 70                     | 1.2709   | 1.4819   | 1.3764    | 211          |
|              | 90                     | 1.2629   | 1.4959   | 1.3794    | 233          |
|              | 110                    | 1.2579   | 1.5109   | 1.3844    | 253          |
|              | 130                    | 1.2509   | 1.5219   | 1.3864    | 271          |
|              | 150                    | 1.2469   | 1.5329   | 1.3899    | 286          |
|              | 170                    | 1.2409   | 1.5469   | 1.3939    | 306          |
|              | 190                    | 1.2369   | 1.5569   | 1.3969    | 320          |
| Ni-POMOF-700 | 10                     | 1.2639   | 1.4539   | 1.3589    | 190          |
|              | 30                     | 1.2299   | 1.5149   | 1.3724    | 285          |
|              | 50                     | 1.2049   | 1.5489   | 1.3769    | 344          |
|              | 70                     | 1.1859   | 1.5779   | 1.3819    | 392          |
|              | 90                     | 1.1689   | 1.6039   | 1.3864    | 435          |
|              | 110                    | 1.1539   | 1.6269   | 1.3904    | 473          |
|              | 130                    | 1.1399   | 1.6479   | 1.3939    | 508          |
|              | 150                    | 1.1269   | 1.6699   | 1.3984    | 543          |
|              | 170                    | 1.1139   | 1.6869   | 1.4004    | 573          |
|              | 190                    | 1.1009   | 1.7059   | 1.4034    | 605          |
| Ni-POMOF-800 | 10                     | 1.2479   | 1.4389   | 1.3434    | 191          |
|              | 30                     | 1.2039   | 1.5009   | 1.3524    | 297          |
|              | 50                     | 1.1739   | 1.5369   | 1.3554    | 363          |
|              | 70                     | 1.1489   | 1.5669   | 1.3579    | 418          |
|              | 90                     | 1.1299   | 1.5949   | 1.3624    | 465          |
|              | 110                    | 1.1099   | 1.6179   | 1.3639    | 508          |
|              | 130                    | 1.0929   | 1.6419   | 1.3674    | 549          |
|              | 150                    | 1.0789   | 1.6629   | 1.3709    | 584          |
|              | 170                    | 1.0649   | 1.6829   | 1.3739    | 618          |
|              | 190                    | 1.0509   | 1.6989   | 1.3749    | 648          |
| Ni-POMOF-900 | 10                     | 1.2689   | 1.4129   | 1.3409    | 144          |
|              | 30                     | 1.2439   | 1.4539   | 1.3489    | 210          |
|              | 50                     | 1.2269   | 1.4789   | 1.3529    | 252          |
|              | 70                     | 1.2149   | 1.4979   | 1.3564    | 283          |
|              | 90                     | 1.2029   | 1.5129   | 1.3579    | 310          |
|              | 110                    | 1.1929   | 1.5279   | 1.3604    | 335          |
|              | 130                    | 1.1849   | 1.5449   | 1.3649    | 360          |
|              | 150                    | 1.1759   | 1.5579   | 1.3669    | 382          |

Continued on next page

Table S12 – continued from previous page

| Sample        | Scan rate             | $E_{pc}$ | $E_{pa}$ | $E_{1/2}$ | $\Delta E_p$ |
|---------------|-----------------------|----------|----------|-----------|--------------|
|               | (mV s <sup>-1</sup> ) | (V)      | (V)      | (V)       | (mV)         |
|               | 170                   | 1.1679   | 1.5719   | 1.3699    | 404          |
|               | 190                   | 1.1589   | 1.5829   | 1.3709    | 424          |
| Ni-POMOF-1000 | 10                    | 1.2579   | 1.4149   | 1.3364    | 157          |
|               | 30                    | 1.2299   | 1.4619   | 1.3459    | 232          |
|               | 50                    | 1.2119   | 1.4889   | 1.3504    | 277          |
|               | 70                    | 1.1959   | 1.5109   | 1.3534    | 315          |
|               | 90                    | 1.1829   | 1.5299   | 1.3564    | 347          |
|               | 110                   | 1.1709   | 1.5459   | 1.3584    | 375          |
|               | 130                   | 1.1609   | 1.5639   | 1.3624    | 403          |
|               | 150                   | 1.1499   | 1.5789   | 1.3644    | 429          |
|               | 170                   | 1.1389   | 1.5919   | 1.3654    | 453          |
|               | 190                   | 1.1309   | 1.6069   | 1.3689    | 476          |

Table S13: Comparison of overpotentials of the thermal derivation composites with other studies

| Catalyst                               | Electrolyte | $j$ (mA cm <sup>-2</sup> ) | Overpotential (mV) | Ref.      |
|----------------------------------------|-------------|----------------------------|--------------------|-----------|
| Co-POMOF-700                           | 1 M KOH     | 10                         | 364                | this work |
| Co <sub>2</sub> -tzpa                  | 1 M KOH     | 10                         | 336                | [35]      |
| Co-MOF-2                               | 1 M KOH     | 10                         | 343                | [21]      |
| Co@N-CNTF                              | 1 M KOH     | 10                         | 350                | [36]      |
| Co-BTC/CC                              | 1 M KOH     | 10                         | 370                | [37]      |
| rGO/Co <sub>2</sub> P-800              | 1 M KOH     | 10                         | 378                | [38]      |
| Co/Cu-MOF                              | 1 M KOH     | 10                         | 395                | [39]      |
| Ni-POMOF-900                           | 1 M KOH     | 10                         | 328                | this work |
| CoNi hydroxide UNSs                    | 1 M KOH     | 10                         | 324                | [40]      |
| C@NiCo <sub>12</sub>                   | 1 M KOH     | 10                         | 330                | [41]      |
| Fe <sub>2</sub> O <sub>3</sub> @Ni-450 | 1 M KOH     | 10                         | 370                | [42]      |
| Ni-BTC/CC                              | 1 M KOH     | 10                         | 390                | [37]      |
| UTSA-16                                | 1 M KOH     | 10                         | 408                | [43]      |



## References

- [1] C.-L. Wang, C.-Q. Song, W.-H. Shen, Y.-Y. Qi, Y. Xue, Y.-C. Shi, H. Yu, L. Feng, [A two-dimensional Ni\(II\) coordination polymer based on a 3,5-bis\(1',2',4'-triazol-1'-yl\)pyridine ligand for water electro-oxidation](#), *Catal. Sci. Technol.* 9 (2019) 1769–1773. doi:10.1039/C9CY00191C. URL <http://dx.doi.org/10.1039/C9CY00191C>
- [2] J. Sun, T. Zhou, D. Pan, X. Zhang, Y. Wang, Y.-C. Shi, H. Yu, [Synthesis, structure, and photoluminescence properties of coordination polymers of 4,4',4'',4'''-tetrakis\(carboxyphenyl\)silane and 3,5-bis\(1',2',4'-triazol-1'-yl\) pyridine](#), *CrystEngComm* 22 (2020) 534–545. doi:10.1039/C9CE01529A. URL <http://dx.doi.org/10.1039/C9CE01529A>
- [3] Bruker AXS Inc., Madison, Wisconsin, USA, SMART & SAINT Software Reference Manuals, 6th Edition (2003).
- [4] G. M. Sheldrick, SADABS: Software for Empirical Absorption Correction, University of Göttingen, 2nd Edition (2002).
- [5] G. M. Sheldrick, SHELXTL, Bruker AXS Inc., Madison, Wisconsin, USA, 6th Edition (2001).
- [6] Bruker AXS Inc., Madison, Wisconsin, USA, SHELXTL Reference Manual, 6th Edition (2000).
- [7] G. M. Sheldrick, [SHELXT – Integrated space-group and crystal-structure determination](#), *Acta Crystallogr., Sect. A* 71 (1) (2015) 3–8. doi:10.1107/S2053273314026370. URL <https://doi.org/10.1107/S2053273314026370>
- [8] G. M. Sheldrick, [Crystal structure refinement with SHELXL](#), *Acta Crystallogr., Sect. C* 71 (1) (2015) 3–8. doi:10.1107/S2053229614024218. URL <http://dx.doi.org/10.1107/S2053229614024218>
- [9] P. Müller, R. Herbst-Irmer, A. L. Spek, T. R. Schneider, M. R. Sawaya, *Crystal Structure Refinement: A Crystallographer's Guide to SHELXL*, Oxford University Press, Oxford, 2006.
- [10] O. V. Dolomanov, L. J. Bourhis, R. J. Gildea, J. A. K. Howard, H. Puschmann, [OLEX2: a complete structure solution, refinement and analysis program](#), *J. Appl. Crystallogr.* 42 (2) (2009) 339–341. doi:10.1107/S0021889808042726. URL <http://dx.doi.org/10.1107/S0021889808042726>
- [11] V. A. Blatov, A. P. Shevchenko, D. M. Proserpio, [Applied topological analysis of crystal structures with the program package ToposPro](#), *Cryst. Growth Des.* 14 (7) (2014) 3576–3586. arXiv:<http://dx.doi.org/10.1021/cg500498k>, doi:10.1021/cg500498k. URL <http://dx.doi.org/10.1021/cg500498k>

- [12] K. Bradenburg, Diamond Version 3.1em, Crystal Impact GbR, Bonn, Germany, version 3.1em Edition (2005).
- [13] S. Al Sobhi, I. AlShibane, C. R. A. Catlow, A. Daisley, J. S. J. Hargreaves, A. L. Hector, M. D. Higham, C. D. Zeinalipour-Yazdi, *A Comparison of the Reactivity of the Lattice Nitrogen in Tungsten Substituted  $\text{Co}_3\text{Mo}_3\text{N}$  and  $\text{Ni}_2\text{Mo}_3\text{N}$* , *ChemSusChem* 16 (22) (2023) e202300945. [arXiv:https://chemistry-europe.onlinelibrary.wiley.com/doi/pdf/10.1002/cssc.202300945](https://arxiv.org/abs/https://chemistry-europe.onlinelibrary.wiley.com/doi/pdf/10.1002/cssc.202300945), [doi:https://doi.org/10.1002/cssc.202300945](https://doi.org/10.1002/cssc.202300945).  
URL <https://chemistry-europe.onlinelibrary.wiley.com/doi/abs/10.1002/cssc.202300945>
- [14] S. Hund, O. Gómez-Cápiro, H. Ruland, E. M. Heppke, M. Lerch,  *$\text{Ni}_2\text{Mo}_3\text{N}$ : crystal structure, thermal properties, and catalytic activity for ammonia decomposition*, *Zeitschrift für Naturforschung B* 79 (4) (2024) 147–153. [doi:doi:10.1515/znb-2023-0071](https://doi.org/10.1515/znb-2023-0071).  
URL <https://doi.org/10.1515/znb-2023-0071>
- [15] K. Maliutina, J. Huang, T. Su, J. Yu, L. Fan, *Biomass-derived Ta,N,S co-doped CNTs enriched carbon catalyst for efficient electrochemical oxygen reduction*, *J. Alloys Compd.* 888 (2021) 161479. [doi:https://doi.org/10.1016/j.jallcom.2021.161479](https://doi.org/10.1016/j.jallcom.2021.161479).  
URL <https://www.sciencedirect.com/science/article/pii/S0925838821028887>
- [16] S. I. Moseenkov, V. L. Kuznetsov, N. A. Zolotarev, B. A. Kolesov, I. P. Prosvirin, A. V. Ishchenko, A. V. Zavorin, *Investigation of Amorphous Carbon in Nanostructured Carbon Materials (A Comparative Study by TEM, XPS, Raman Spectroscopy and XRD)*, *Materials* 16 (3) (2023) 1112. [doi:10.3390/ma16031112](https://doi.org/10.3390/ma16031112).  
URL <https://www.mdpi.com/1996-1944/16/3/1112>
- [17] B. Fan, H. Wang, H. Zhang, Y. Song, X. Zheng, C. Li, Y. Tan, X. Han, Y. Deng, W. Hu, *Phase Transfer of  $\text{Mo}_2\text{C}$  Induced by Boron Doping to Boost Nitrogen Reduction Reaction Catalytic Activity*, *Adv. Funct. Mater.* 32 (20) (2022) 2110783. [arXiv:https://onlinelibrary.wiley.com/doi/pdf/10.1002/adfm.202110783](https://arxiv.org/abs/https://onlinelibrary.wiley.com/doi/pdf/10.1002/adfm.202110783), [doi:https://doi.org/10.1002/adfm.202110783](https://doi.org/10.1002/adfm.202110783).  
URL <https://onlinelibrary.wiley.com/doi/abs/10.1002/adfm.202110783>
- [18] Y. Guo, Q. Huang, J. Ding, L. Zhong, T.-T. Li, J. Pan, Y. Hu, J. Qian, S. Huang, *CoMo carbide/nitride from bimetallic MOF precursors for enhanced OER performance*, *Int. J. Hydrogen Energy* 46 (43) (2021) 22268–22276. [doi:https://doi.org/10.1016/j.ijhydene.2021.04.084](https://doi.org/10.1016/j.ijhydene.2021.04.084).  
URL <https://www.sciencedirect.com/science/article/pii/S0360319921014336>
- [19] G. Ran, J. Yang, Y. Xing, Y. Zhang, X. Tang, Q. Hu, K. Huang, Z. Zou, H. Yu, X. Xiong, *A novel  $\text{Co}_3\text{Mo}_3\text{N}$  self-embedded in porous carbon nanocomposite derived*

- from Mo doped ZIF-67: An effective catalyst for electrochemical H<sub>2</sub>O<sub>2</sub> sensing, *Micromol. Chem. A* 185 (2023) 108296. doi:<https://doi.org/10.1016/j.micromol.2022.108296>.  
URL <https://www.sciencedirect.com/science/article/pii/S0026265X22011249>
- [20] M. S. Hamdan, Riyanto, M. R. Othman, Preparation and characterization of nano size niooh by direct electrochemical oxidation of nickel plate, *Int. J. Electrochem. Sci.* 8 (2013) 4747–4760.  
URL <http://www.electrochemsci.org/papers/vol8/80404747.pdf>
- [21] P. Muthukumar, G. Arunkumar, M. Pannipara, A. G. Al-Sehemi, D. Moon, S. P. Anthony, Enhancing the electrocatalytic OER activity of Co-MOFs through labile solvents coordination, *New J. Chem.* 47 (2023) 20831–20837. doi:[10.1039/D3NJ03660J](https://doi.org/10.1039/D3NJ03660J).  
URL <http://dx.doi.org/10.1039/D3NJ03660J>
- [22] T. Cao, Y. Li, T. Xie, X. Wang, Z. Huang, H. Yu, Synthesis, structures and electrocatalytic properties of coordination polymers of 4,4',4'',4'''-tetrakis(carboxyphenyl)silane and 1,3,5-tris(2-methyl-1*H*-imidazol-1-yl)benzene, *CrystEngComm* 26 (2024) 985–994. doi:[10.1039/D3CE01266B](https://doi.org/10.1039/D3CE01266B).  
URL <http://dx.doi.org/10.1039/D3CE01266B>
- [23] W. Zheng, *iR* Compensation for Electrocatalysis Studies: Considerations and Recommendations, *ACS Energy Lett.* 8 (4) (2023) 1952–1958. arXiv:<https://doi.org/10.1021/acscenergylett.3c00366>, doi:[10.1021/acscenergylett.3c00366](https://doi.org/10.1021/acscenergylett.3c00366).  
URL <https://doi.org/10.1021/acscenergylett.3c00366>
- [24] L. Zhang, T. Mi, M. A. Ziaee, L. Liang, R. Wang, Hollow POM@MOF hybrid-derived porous Co<sub>3</sub>O<sub>4</sub>/CoMoO<sub>4</sub> nanocages for enhanced electrocatalytic water oxidation, *J. Mater. Chem. A* 6 (2018) 1639–1647. doi:[10.1039/C7TA08683K](https://doi.org/10.1039/C7TA08683K).  
URL <http://dx.doi.org/10.1039/C7TA08683K>
- [25] T. Shinagawa, A. T. Garcia-Esparza, K. Takanebe, Insight on Tafel slopes from a microkinetic analysis of aqueous electrocatalysis for energy conversion, *Sci. Rep.* 5 (2015) 13801. doi:[10.1038/srep13801](https://doi.org/10.1038/srep13801).  
URL <https://www.nature.com/articles/srep13801>
- [26] N.-T. Suen, S.-F. Hung, Q. Quan, N. Zhang, Y.-J. Xu, H. M. Chen, Electrocatalysis for the oxygen evolution reaction: recent development and future perspectives, *Chem. Soc. Rev.* 46 (2017) 337–365. doi:[10.1039/C6CS00328A](https://doi.org/10.1039/C6CS00328A).  
URL <http://dx.doi.org/10.1039/C6CS00328A>
- [27] O. van der Heijden, S. Park, R. E. Vos, J. J. J. Eggebeen, M. T. M. Koper, Tafel slope plot as a tool to analyze electrocatalytic reactions, *ACS Energy Lett.* 9 (4) (2024) 1871–1879. arXiv:<https://doi.org/10.1021/acscenergylett.4c00266>, doi:[10.1021/acscenergylett.4c00266](https://doi.org/10.1021/acscenergylett.4c00266).  
URL <https://doi.org/10.1021/acscenergylett.4c00266>

- [28] W. Wu, Q. Lu, G. Li, Y. Wang, How to extract kinetic information from Tafel analysis in electrocatalysis, *J. Chem. Phys.* 159 (22) (2023) 221501. [arXiv:https://pubs.aip.org/aip/jcp/article-pdf/doi/10.1063/5.0175156/19848719/221501\\_1\\_5.0175156.pdf](https://pubs.aip.org/aip/jcp/article-pdf/doi/10.1063/5.0175156/19848719/221501_1_5.0175156.pdf), doi:10.1063/5.0175156. URL <https://doi.org/10.1063/5.0175156>
- [29] Z. Ren, S. Wang, J. Yu, F. Mao, K. Wang, H. Wu, Cu/MoO<sub>2</sub> Schottky heterojunction derived from a new designed POMOFs in-situ as high efficient electrocatalysts for hydrogen evolution reaction in universal-pH electrolytes and seawater, *Chem. Eng. J.* 470 (2023) 144107. doi:<https://doi.org/10.1016/j.cej.2023.144107>. URL <https://www.sciencedirect.com/science/article/pii/S1385894723028383>
- [30] W. Zheng, M. Liu, L. Y. S. Lee, Electrochemical instability of metal–organic frameworks: In situ spectroelectrochemical investigation of the real active sites, *ACS Catal.* 10 (1) (2020) 81–92. [arXiv:https://doi.org/10.1021/acscatal.9b03790](https://doi.org/10.1021/acscatal.9b03790), doi:10.1021/acscatal.9b03790. URL <https://doi.org/10.1021/acscatal.9b03790>
- [31] J. J. Van Benschoten, J. Y. Lewis, W. R. Heineman, D. A. Roston, P. T. Kissinger, Cyclic voltammetry experiment, *J. Chem. Educ.* 60 (9) (1983) 772–776. [arXiv:https://doi.org/10.1021/ed060p772](https://doi.org/10.1021/ed060p772), doi:10.1021/ed060p772. URL <https://doi.org/10.1021/ed060p772>
- [32] N. Elgrishi, K. J. Rountree, B. D. McCarthy, E. S. Rountree, T. T. Eisenhart, J. L. Dempsey, A practical beginner’s guide to cyclic voltammetry, *J. Chem. Educ.* 95 (2) (2018) 197–206. [arXiv:https://doi.org/10.1021/acs.jchemed.7b00361](https://doi.org/10.1021/acs.jchemed.7b00361), doi:10.1021/acs.jchemed.7b00361. URL <https://doi.org/10.1021/acs.jchemed.7b00361>
- [33] S. Tanimoto, A. Ichimura, Discrimination of inner- and outer-sphere electrode reactions by cyclic voltammetry experiments, *J. Chem. Educ.* 90 (6) (2013) 778–781. [arXiv:https://doi.org/10.1021/ed200604m](https://doi.org/10.1021/ed200604m), doi:10.1021/ed200604m. URL <https://doi.org/10.1021/ed200604m>
- [34] L. Trotochaud, S. L. Young, J. K. Ranney, S. W. Boettcher, Nickel–iron oxyhydroxide oxygen-evolution electrocatalysts: The role of intentional and incidental iron incorporation, *J. Am. Chem. Soc.* 136 (18) (2014) 6744–6753. [arXiv:https://doi.org/10.1021/ja502379c](https://doi.org/10.1021/ja502379c), doi:10.1021/ja502379c. URL <https://doi.org/10.1021/ja502379c>
- [35] N. Liu, Q. Zhang, J. Guan, A binuclear co-based metal–organic framework towards efficient oxygen evolution reaction, *Chem. Commun.* 57 (2021) 5016–5019. doi:10.1039/D1CC01492G. URL <http://dx.doi.org/10.1039/D1CC01492G>

- [36] H. Guo, Q. Feng, J. Zhu, J. Xu, Q. Li, S. Liu, K. Xu, C. Zhang, T. Liu, Cobalt nanoparticle-embedded nitrogen-doped carbon/carbon nanotube frameworks derived from a metal–organic framework for tri-functional ORR, OER and HER electrocatalysis, *J. Mater. Chem. A* 7 (2019) 3664–3672. doi:10.1039/C8TA11400E. URL <http://dx.doi.org/10.1039/C8TA11400E>
- [37] S. Naik Shreyanka, J. Theerthagiri, S. J. Lee, Y. Yu, M. Y. Choi, Multiscale design of 3D metal–organic frameworks (M–BTC, M: Cu, Co, Ni) via PLAL enabling bifunctional electrocatalysts for robust overall water splitting, *Chem. Eng. J.* 446 (2022) 137045. doi:<https://doi.org/10.1016/j.cej.2022.137045>. URL <https://www.sciencedirect.com/science/article/pii/S1385894722025372>
- [38] X. Zhao, Y. Fan, H. Wang, C. Gao, Z. Liu, B. Li, Z. Peng, J.-H. Yang, B. Liu, Cobalt phosphide-embedded reduced graphene oxide as a bifunctional catalyst for overall water splitting, *ACS Omega* 5 (12) (2020) 6516–6522. arXiv:<https://doi.org/10.1021/acsomega.9b04143>, doi:10.1021/acsomega.9b04143. URL <https://doi.org/10.1021/acsomega.9b04143>
- [39] Q. Qiu, T. Wang, L. Jing, K. Huang, D. Qin, Tetra-carboxylic acid based metal-organic framework as a high-performance bifunctional electrocatalyst for HER and OER, *Int. J. Hydrogen Energy* 45 (19) (2020) 11077–11088. doi:<https://doi.org/10.1016/j.ijhydene.2020.02.033>. URL <https://www.sciencedirect.com/science/article/pii/S0360319920305152>
- [40] K. He, Z. Cao, R. Liu, Y. Miao, H. Ma, Y. Ding, *In situ* decomposition of metal–organic frameworks into ultrathin nanosheets for the oxygen evolution reaction, *Nano Res.* 9 (6) (2016) 1856–1865. doi:10.1007/s12274-016-1078-x. URL <https://doi.org/10.1007/s12274-016-1078-x>
- [41] S. Tan, W. Ouyang, Y. Ji, Q. Hong, Carbon wrapped bimetallic NiCo nanospheres toward excellent HER and OER performance, *J. Alloys Compd.* 889 (2021) 161528. doi:<https://doi.org/10.1016/j.jallcom.2021.161528>. URL <https://www.sciencedirect.com/science/article/pii/S0925838821029376>
- [42] C. Stienen, G. Bendt, Direct mocvd growth of iron oxide on three-dimensional nickel foam as electrode for the oxygen evolution reaction, *ChemSusChem* 13 (22) (2020) 5954–5961. arXiv:<https://chemistry-europe.onlinelibrary.wiley.com/doi/pdf/10.1002/cssc.202001896>, doi:<https://doi.org/10.1002/cssc.202001896>. URL <https://chemistry-europe.onlinelibrary.wiley.com/doi/abs/10.1002/cssc.202001896>
- [43] J. Jiang, L. Huang, X. Liu, L. Ai, Bioinspired cobalt–citrate metal–organic framework as an efficient electrocatalyst for water oxidation, *ACS Appl. Mater. Interfaces* 9 (8) (2017) 7193–7201. arXiv:<http://dx.doi.org/10.1021/acsami.6b16534>, doi:10.1021/acsami.6b16534. URL <http://dx.doi.org/10.1021/acsami.6b16534>
